# Supplementary material
Source: PubMed Central journal article supplement (PMC7934674)
Supplement: mmc1.pdf [file mmc1.pdf]

**Cell Host & Microbe, Volume 29**

**Supplemental information**

**SARS-CoV-2 variant B.1.1.7 is susceptible  
to neutralizing antibodies  
elicited by ancestral spike vaccines**

**Xiaoying Shen, Haili Tang, Charlene McDanal, Kshitij Wagh, William Fischer, James Theiler, Hyejin Yoon, Dapeng Li, Barton F. Haynes, Kevin O. Sanders, Sandrasegaram Gnanakaran, Nick Hengartner, Rolando Pajon, Gale Smith, Gregory M. Glenn, Bette Korber, and David C. Montefiori**

## **Contents of Supplemental Information**

### **Supplementary figures:**

Figure S1. Parsimony tree showing the relationships between B.1.1.7 and other variants with key mutations, related to Figure 1.

Figure S2. Highlighter plot showing the mutations associated with major clade in the UK and Denmark transitioning over time, related to Figure 1.

Figure S3. Transitions in key mutational patterns over time in local regions in Denmark and in England, related to Figure 1.

### **Supplementary figure legends.**

### **Supplementary tables:**

Table S1. Serum neutralization titers and fold difference (D614G/Variant), related to Figure 2.

Table S2. Statistical results, related to Figure 2.

Table S3. Primers used for site-directed-mutagenesis, related to STAR Methods.

Figure S1

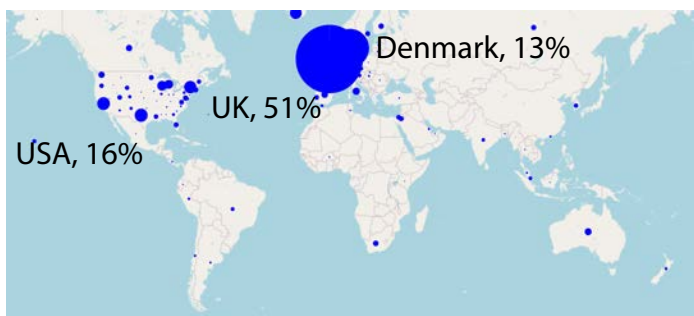

Global Sampling, Jun. 1, 2020 -Jan. 15, 2021

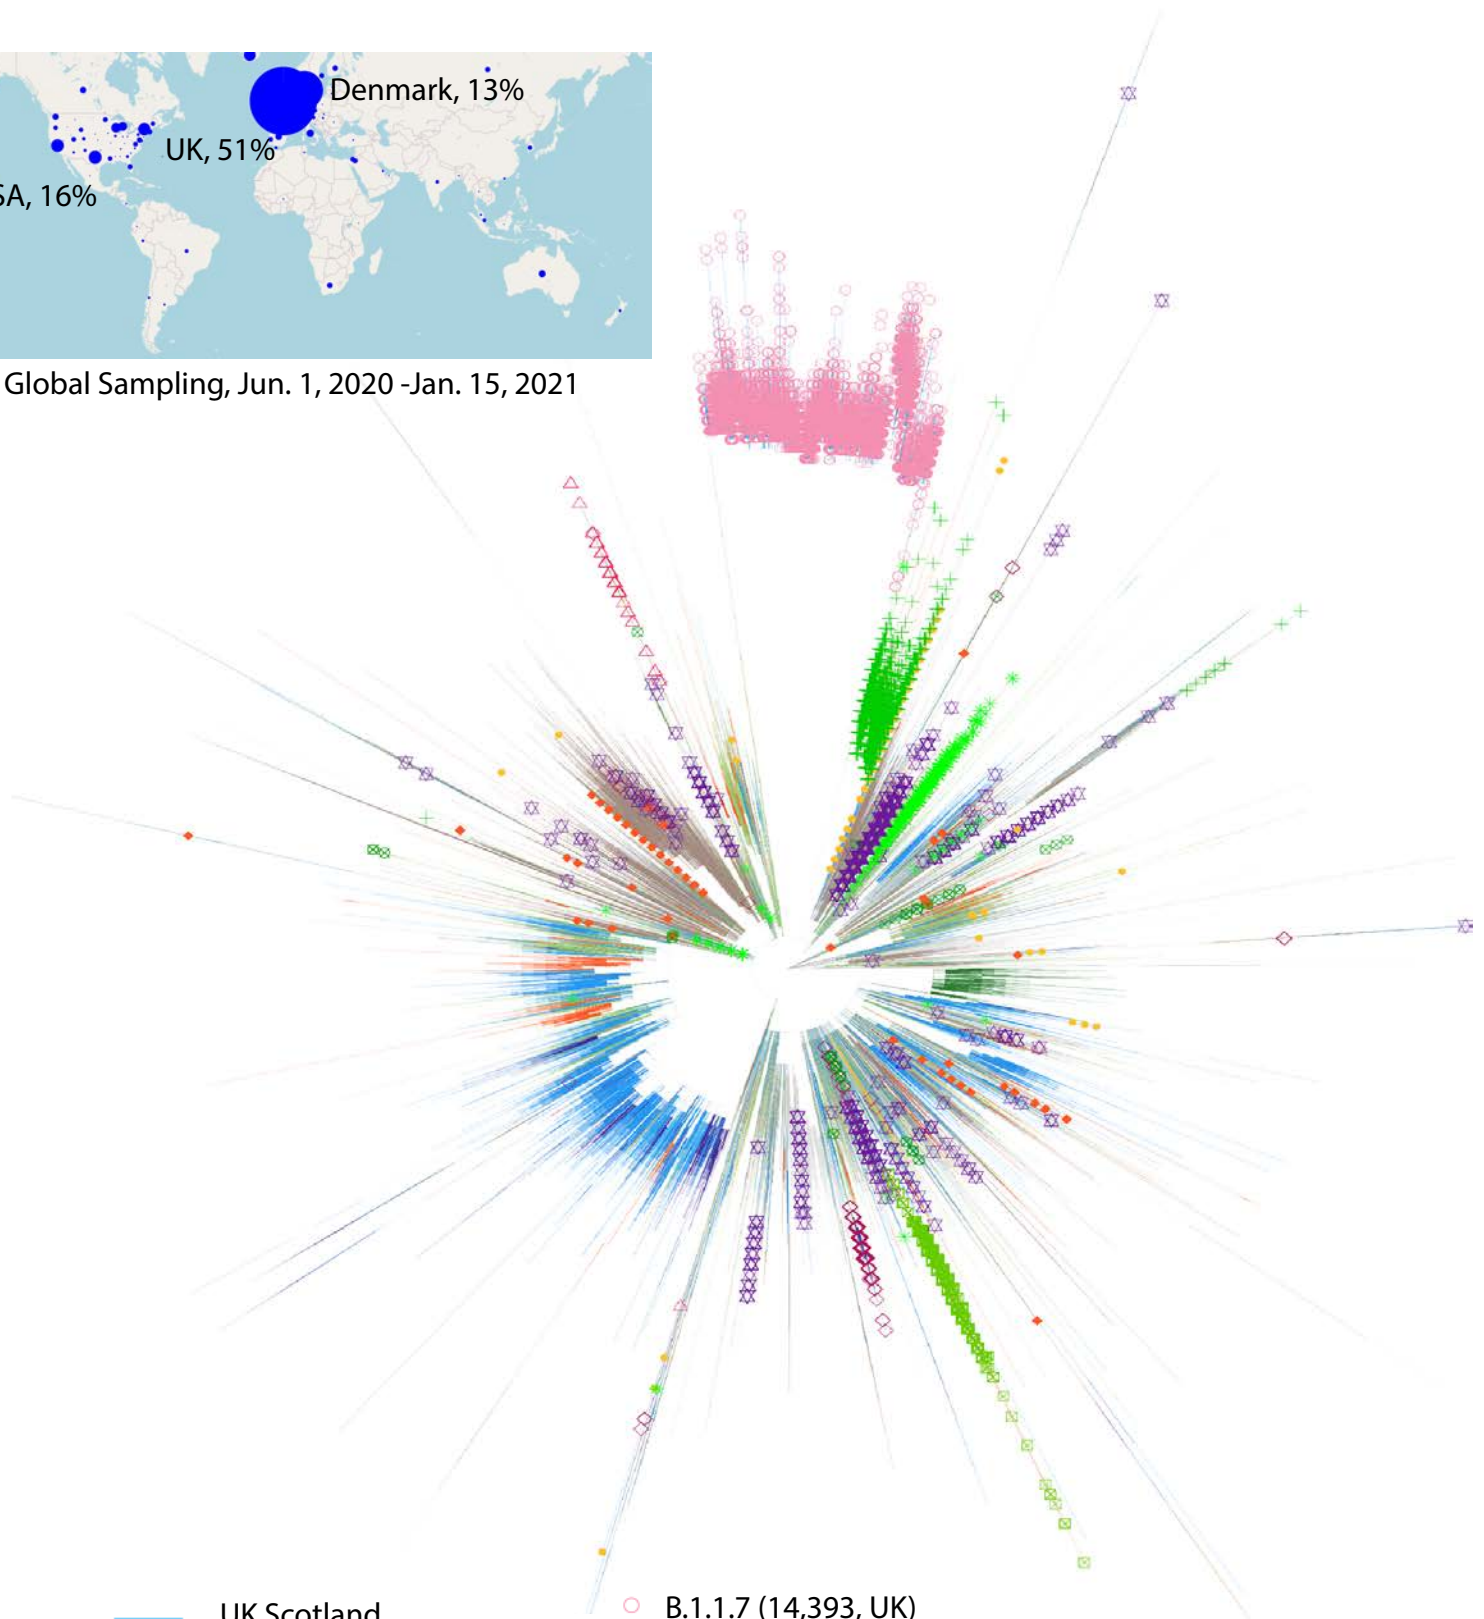

- UK Scotland
- UK England
- UK Ireland
- UK Wales
- Europe, not Denmark
- Australia
- South Africa
- Denmark
- USA

- B.1.1.7 (14,393, UK)
- △ 501Y.V2 (71, S. Africa)
- ◇ N501Y (439, Wales)
- ◆ N501T (233, Australia)
- del69/70 (200, US, UK)
- + del69/70 + N439K (4,319, Denmark, UK)
- \* N439K (1,253, Denmark, UK)
- ⊠ del69/70 + Y453F (791, Denmark, UK)
- ⊞ Y453F (150, Denmark, UK)
- ⊗ P681H (1552, US (Hawaii))

Figure S2

Genome position, reference strain NC\_045512

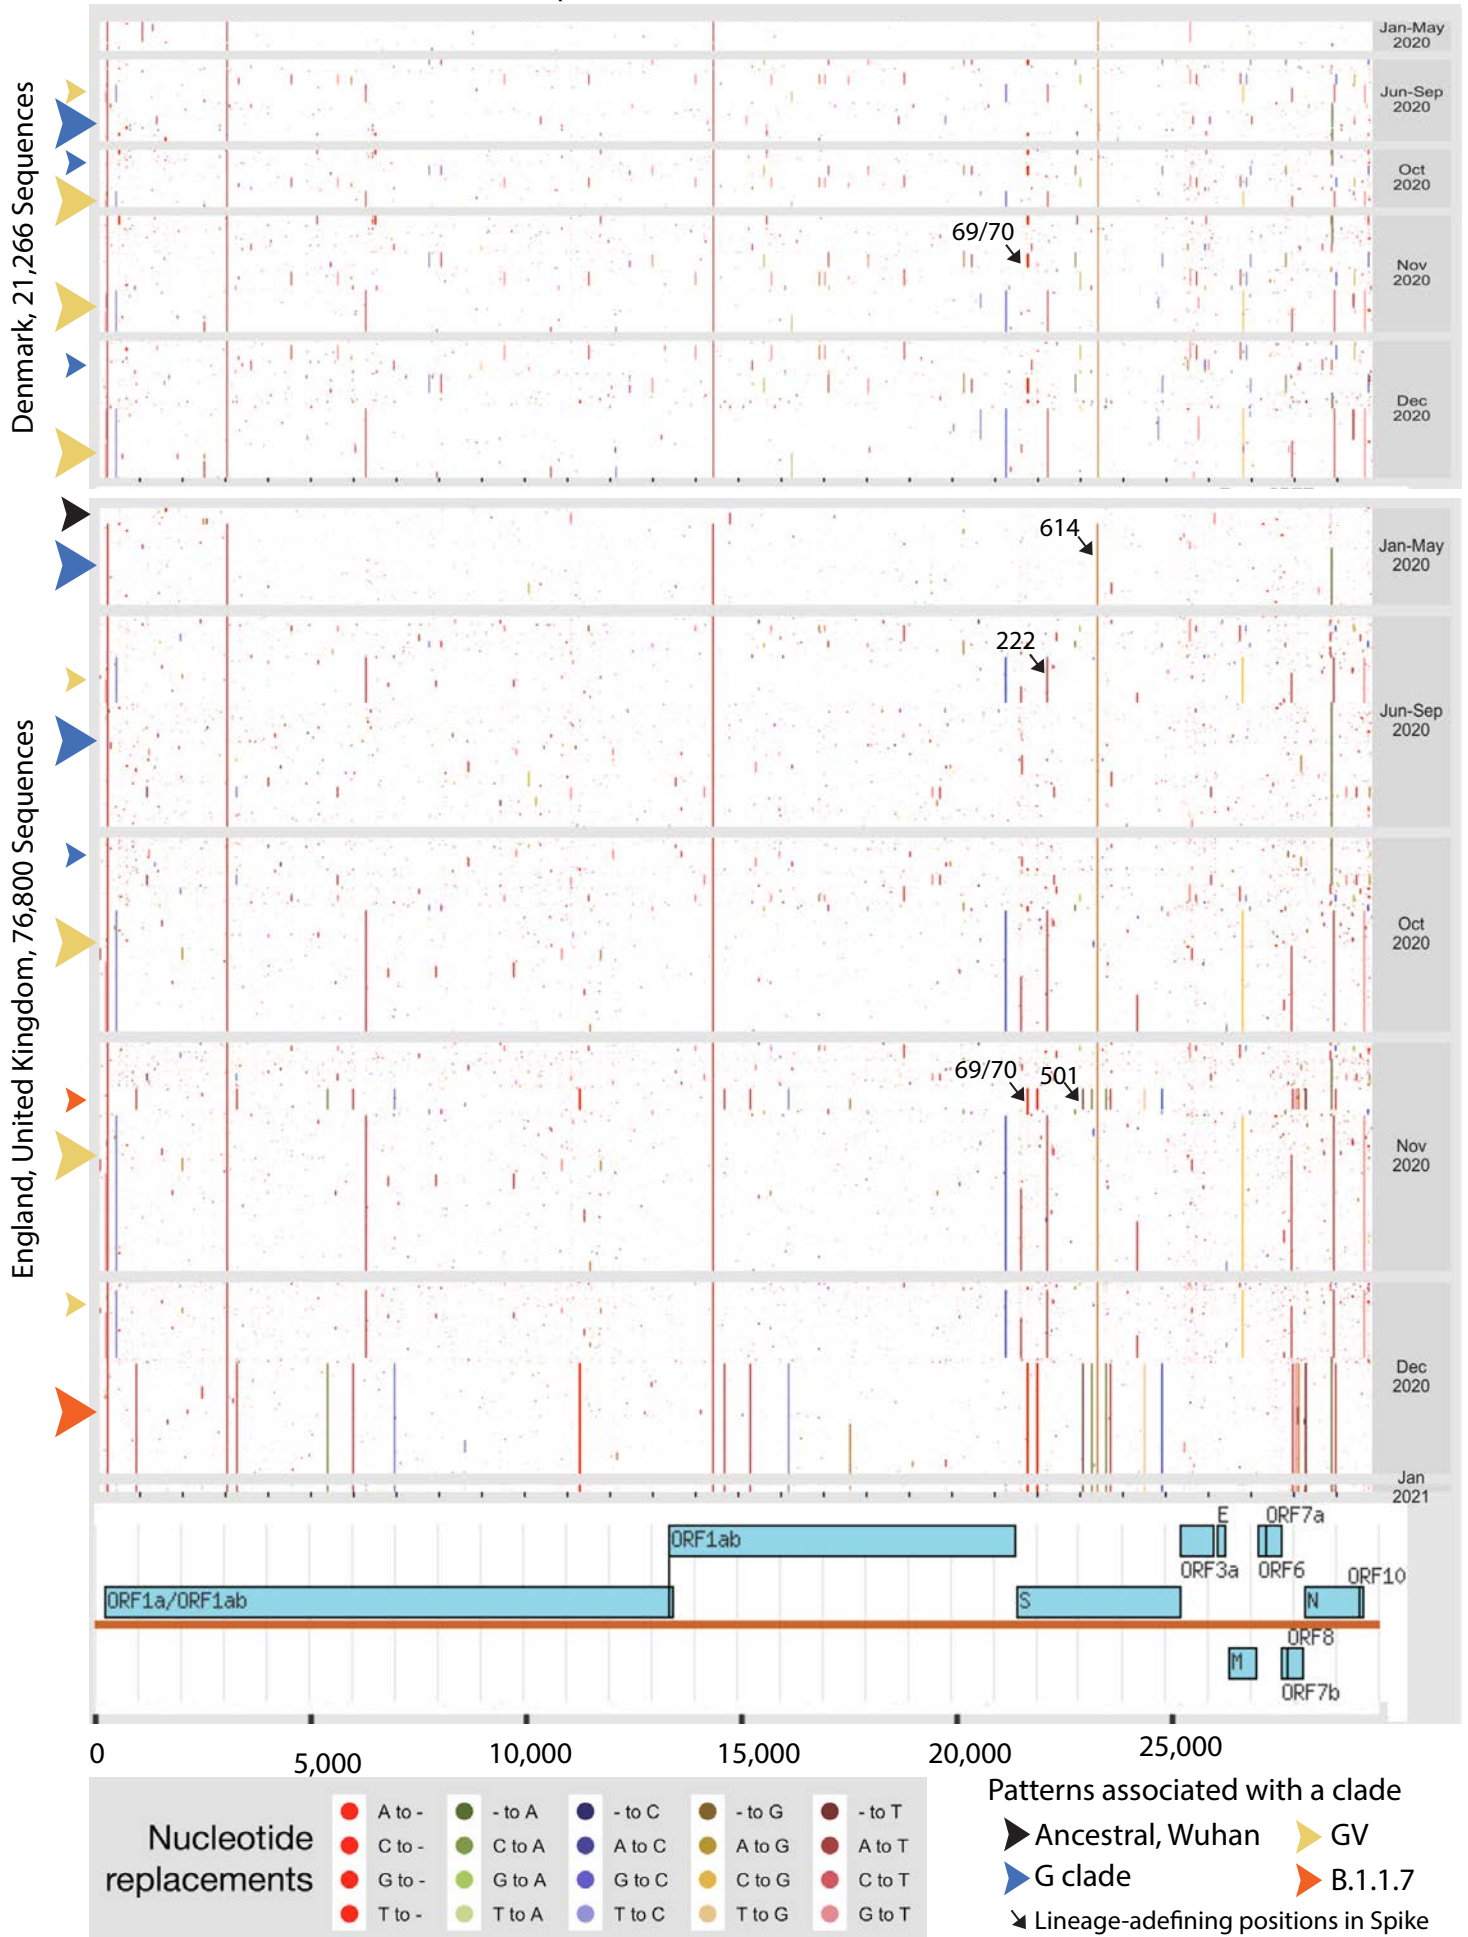

**Figure S3**

**A. Spike transitions within the UK: weekly running averages**

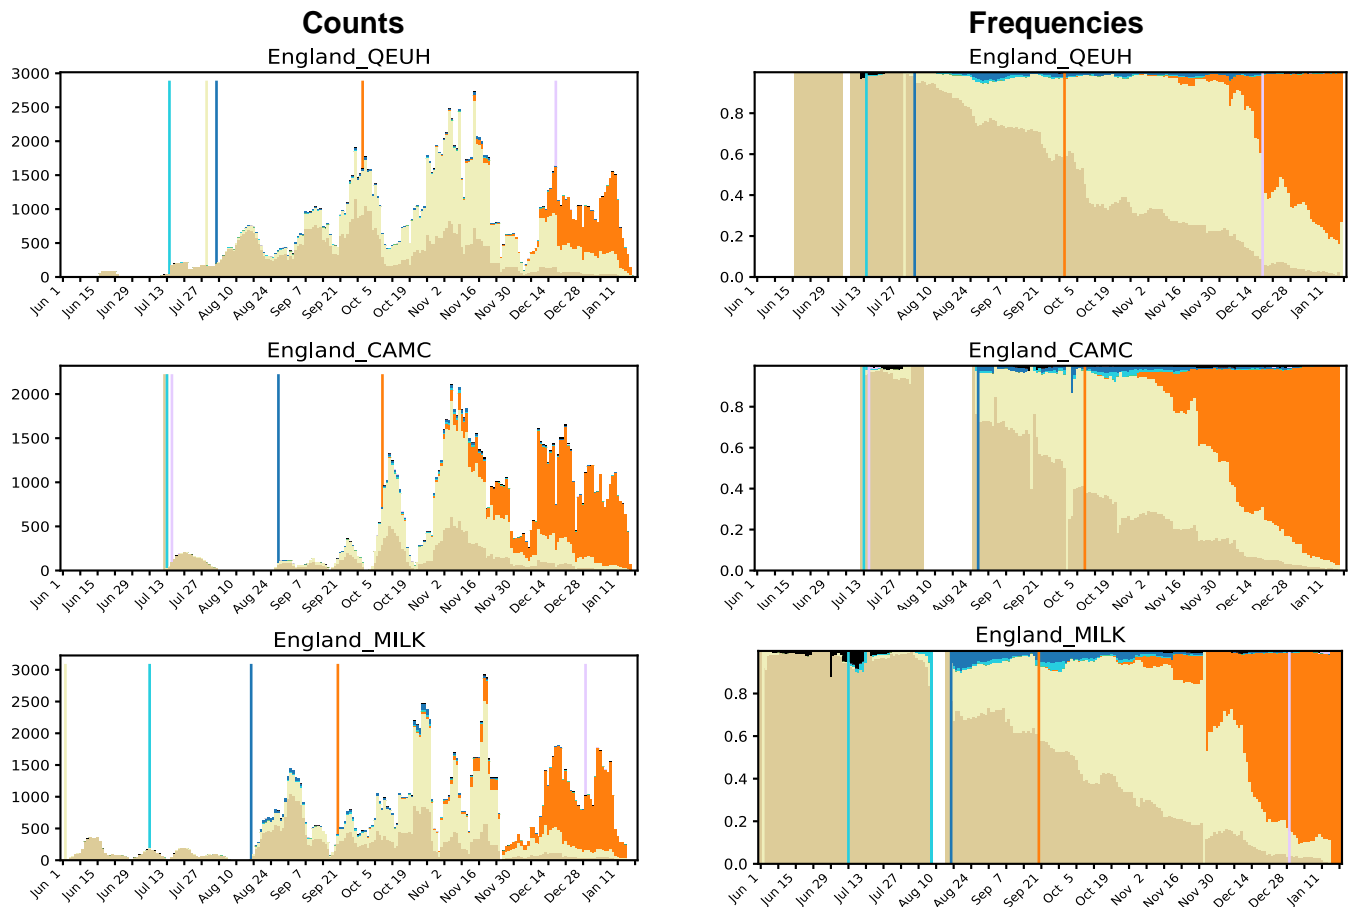

**B. Spike transitions within Denmark: weekly running averages**

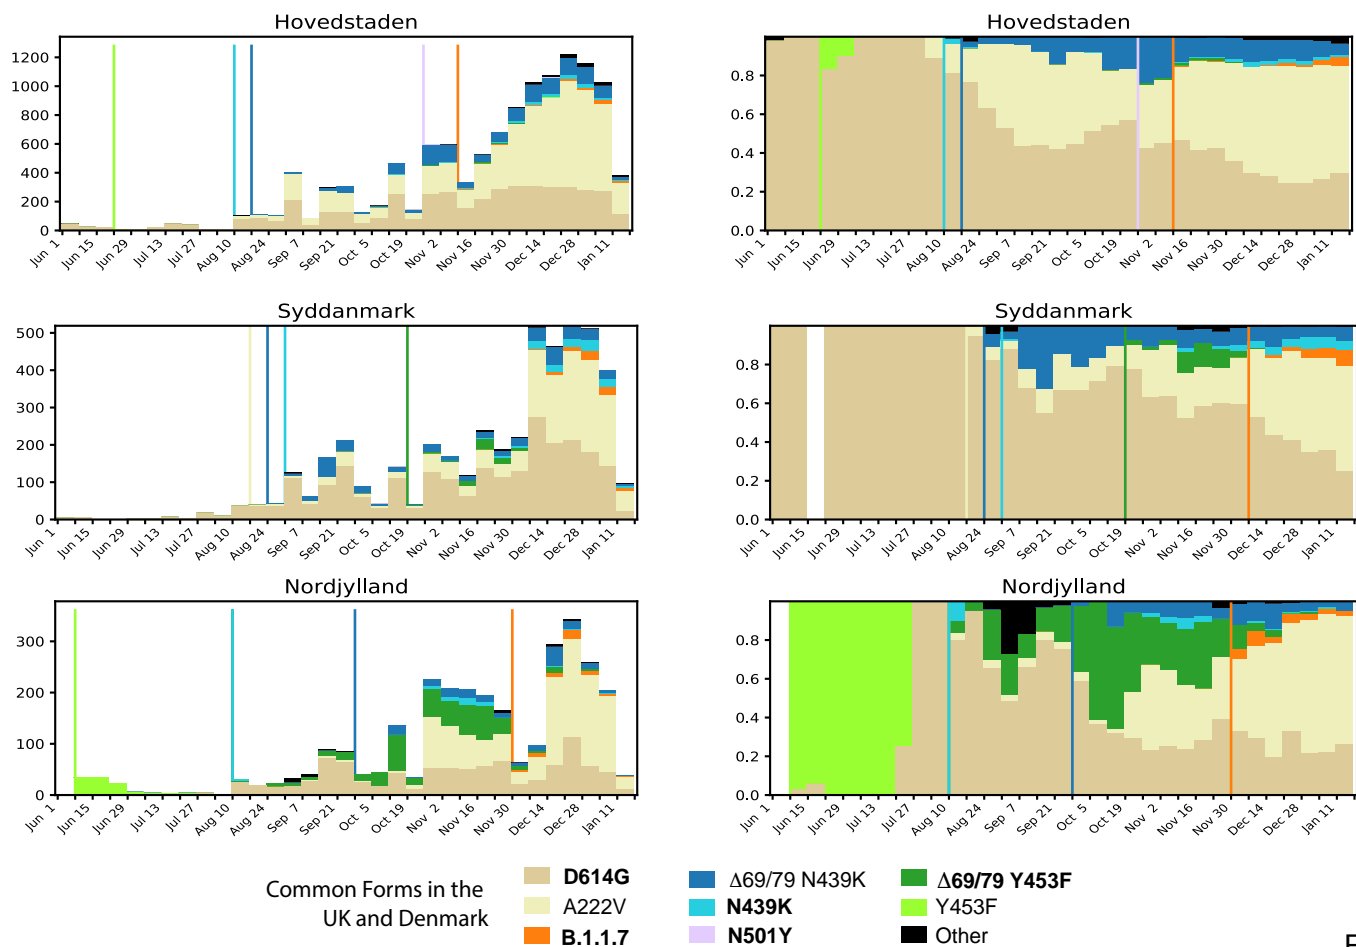

Fig. S3

**Fig. S1. Parsimony tree showing the relationships between B.1.1.7 and other variants with key mutations.** 244,291 sequences were included in this tree, which is based on the GISAID data sampled on Jan. 17th, 2021. Countries where the variants of interest are commonly found are indicated by branch color, key variants by symbols at the tips. The B.1.1.7 lineage is shown as pink open circles. The B.1.1.7 variant is still predominantly found in the UK, but by Jan. 24<sup>th</sup> 2021 had been sampled in 44 countries, and in 20 different states in the USA. Some of these geographically diverse samples were likely to have been detected as a consequence of sampling travelers from the UK and their contacts, due to the international interest in B.1.1.7 in late Dec. 2020 and early Jan. 2021; regardless of this potential sampling bias, the B.1.1.7 variant clearly has a global presence. The N501Y mutation is also found in the South African Variant of Interest, 501Y.V2, the red open triangles. N501Y has also transiently but significantly emerged in local populations, as a lone Spike mutation on the D614G background, found in the early summer in Victoria, Australia, and also found in Wales (in this figure, and followed over time in Fig. 1). A distinct variant, N501T, has been emerging in Sydney, New South Wales, Australia, that has become increasingly common through December, 2020. Variants carrying the only the deletion in Spike at  $\Delta 69/70$  on a D614G background; on the rare occasions they are found, they were primarily sampled in the UK and US. In contrast,  $\Delta 69/70$  is frequently found coupled with other RBM mutations, either embedded in B.1.1.7 or coupled with N439K or Y453F, commonly circulating in both Denmark and UK as well as in other European countries; N439K and Y453F variants not coupled to  $\Delta 69/70$  are found less frequently (see Fig. 1B). Of note, P681H is embedded in B.1.1.7, but is also frequently found independently, and is often found to increase in frequency regionally when it does arise, and it is recurrent throughout the phylogeny; it is the dominant form in the Hawaiian epidemic, and is found in many places throughout the US. All of the currently variants of interest are in the G clade, Spike D614G background. The map insert includes the subset of complete GISAID sequences with a known sampling date that were sampled since June 1, 2020, and the area of the circle is proportional to sample size, illustrating the strong sampling bias in the data: the UK is contributing over half of the sequences in the dataset, with the USA and Denmark following, these three nations account for 80% of the GISAID sequences that pass through the cov.lanl.gov quality control screen.

**Fig. S2. Highlighter plot showing the mutations associated with major clade in the UK and Denmark transitioning over time.** Distribution of mutations among SARS-CoV-2 sequences from Denmark and from England, UK. These figures are highly compressed pixel plots representing the full sampling of complete sequences from these countries, nearly 100,000 sequences in all, and full length genomes across the x-axis. Each row in the matrix represents a single genome sequence; each column, a genome position. Colored dots denote locations of nucleotide mutations relative to the Wuhan-Hu-1 isolate (GenBank accession NC\_045512); unmutated bases are white to allow visualization of mutations. Sequences are presented in separate panels based on time of sampling. Within each panel, sequences are clustered phylogenetically, ordered top-to-bottom by position within a parsimony-based phylogenetic tree; therefore, mutations at a particular locus that are shared within a lineage are seen as vertical lines, and groupings of vertical lines that start and end at the same heights indicate coherent lineages defined by multiple mutations. Clades with more members are sorted lower. Colored arrowheads at the left margin indicate lineages of particular interest; smaller and larger arrowheads reflect the proportional representation of lineages among samples from a particular time window.

**Fig. S3. Transitions in key mutational patterns over time in local regions in Denmark and in England.** These figures are drawn as in Fig. 1C. Weekly running averages are plotted each day, with the actual counts on the left, and relative frequencies on the right. Regions with white banks indicate no sampling was done in that time frame. **A. English regional data over time.** The overall pattern seen in England in Fig. 1 was consistent across more local sampling in England (QUEH, CAMC, and MILK). The increased frequency of the GV clade, carrying the 4 G clade mutations plus an additional 8 mutations including the A222V mutation begins in early August, and it increases in prevalence relative to the G clade in each local region, but the transitions are more gradual than the later transition to the B.1.1.7 form indicated in orange. The lines indicate when a particular variant was introduced into the region, and the orange line indicates the first introduction of B.1.1.7, first sampled in late September and early October in each region. After the B.1.1.7 variant is first introduced, a very gradual increase in frequency is observed for a period, and then it begins to appreciably increase in frequency. **B. Danish regional data over time.** The B.1.1.7 form was introduced into Danish cities in November/December, and by mid-Jan was becoming more consistently observed. Danish sampling times are indicated on a weekly basis, UK daily, hence the broader bands. The N439K and N453Y variants, particularly in combination with the  $\Delta 69/70$  deletion, were more prominent among Danish samples than among the UK samples; both these and the original D614G form becoming less frequently sampled, and the GV form more prominent, at the point when the B.1.1.7 form was introduced into Denmark.

GV defining mutations from **figure S2**. 12 mutations, include the following  
 G clade mutations are highlighted

|                |                |                |         |
|----------------|----------------|----------------|---------|
| G00204T        | C06286T        | G21255C        | C24334T |
| <b>C00241T</b> | A11533G        | C21614T        | T26424C |
| T00445C        | <b>C14408T</b> | C22227T        | C26801G |
| <b>C03037T</b> | C15352T        | <b>A23403G</b> | C27944T |

B.1.1.7 mutations: 40 mutations

|                |                |                |         |
|----------------|----------------|----------------|---------|
| <b>C00241T</b> | T11293-        | A21768-        | G24914C |
| <b>C00913T</b> | T11294-        | T21769-        | C27972T |
| <b>C03037T</b> | T11295-        | G21770A        | G28048T |
| C03267T        | T11296-        | T21992-        | A28111G |
| C05388A        | <b>C14408T</b> | A21993-        | G28280C |
| C05986T        | C14676T        | T21994-        | A28281T |
| T06954C        | C15279T        | A23063T        | T28282A |
| T11288-        | T16176C        | C23271A        | G28881A |
| C11289-        | A21764-        | <b>A23403G</b> | G28882A |
| T11290-        | T21765-        | C23604A        | G28883C |
| G11291-        | A21766-        | C23709T        | C28977T |
| G11292-        | C21767-        | T24506G        |         |

**Table S2.** Statistical results.

| Variable 1     | Variable 2           | <sup>a</sup> Group Identifier | Measurement        | Sample Size | p value                | q value  | median_ Variable 1 | median_ Variable 2 | Figure referece | Test                                   |
|----------------|----------------------|-------------------------------|--------------------|-------------|------------------------|----------|--------------------|--------------------|-----------------|----------------------------------------|
| D614G          | B.1.1.7              | MDP1.1                        | ID50               | 40          | <b><u>5.80E-06</u></b> | 7.73E-05 | 1374               | 687                | 2A              | Wilcoxon signed-rank, paired, 2 tailed |
| D614G          | B.1.1.7              | NVVP1                         | ID50               | 28          | <b><u>1.80E-05</u></b> | 0.00018  | 975                | 448                | 2A              | Wilcoxon signed-rank, paired, 2 tailed |
| D614G          | B.1.1.7              | Convalescent                  | ID50               | 15          | 0.041                  | 0.065    | 1105               | 325                | 2A              | Wilcoxon signed-rank, paired, 2 tailed |
| D614G          | B.1.1.7              | MDP1.1                        | ID80               | 40          | <b><u>5.50E-12</u></b> | 2.20E-10 | 347                | 188                | 2B              | Wilcoxon signed-rank, paired, 2 tailed |
| D614G          | B.1.1.7              | NVVP1                         | ID80               | 28          | <b><u>1.50E-06</u></b> | 3.00E-05 | 209                | 142                | 2B              | Wilcoxon signed-rank, paired, 2 tailed |
| D614G          | B.1.1.7              | Convalescent                  | ID80               | 15          | <b>0.00061</b>         | 0.0022   | 218                | 106                | 2B              | Wilcoxon signed-rank, paired, 2 tailed |
| D614G          | D614G.N501Y          | MDP1.2                        | ID50               | 11          | 0.24                   | 0.30     | 1538               | 1604               | 2A              | Wilcoxon signed-rank, paired, 2 tailed |
| D614G          | D614G.N501Y          | Convalescent                  | ID50               | 15          | <b><u>0.0012</u></b>   | 0.0027   | 1105               | 412                | 2A              | Wilcoxon signed-rank, paired, 2 tailed |
| D614G          | D614G.N501Y          | MDP1.2                        | ID80               | 11          | 0.46                   | 0.53     | 453                | 347                | 2B              | Wilcoxon signed-rank, paired, 2 tailed |
| D614G          | D614G.N501Y          | Convalescent                  | ID80               | 15          | <b>0.00031</b>         | 0.0014   | 218                | 128                | 2B              | Wilcoxon signed-rank, paired, 2 tailed |
| D614G          | D614G.del69-70       | MDP1.2                        | ID50               | 11          | <b>0.00098</b>         | 0.0023   | 1538               | 2896               | 2A              | Wilcoxon signed-rank, paired, 2 tailed |
| D614G          | D614G.del69-70       | Convalescent                  | ID50               | 15          | 0.25                   | 0.30     | 1105               | 1244               | 2A              | Wilcoxon signed-rank, paired, 2 tailed |
| D614G          | D614G.del69-70       | MDP1.2                        | ID80               | 11          | <b>0.00098</b>         | 0.0023   | 453                | 617                | 2B              | Wilcoxon signed-rank, paired, 2 tailed |
| D614G          | D614G.del69-70       | Convalescent                  | ID80               | 15          | 0.15                   | 0.21     | 218                | 301                | 2B              | Wilcoxon signed-rank, paired, 2 tailed |
| D614G          | D614G.del69-70.N501Y | MDP1.2                        | ID50               | 11          | <b><u>0.002</u></b>    | 0.0042   | 1538               | 1804               | 2A              | Wilcoxon signed-rank, paired, 2 tailed |
| D614G          | D614G.del69-70.N501Y | Convalescent                  | ID50               | 15          | 0.073                  | 0.10     | 1105               | 923                | 2A              | Wilcoxon signed-rank, paired, 2 tailed |
| D614G          | D614G.del69-70.N501Y | MDP1.2                        | ID80               | 11          | 0.21                   | 0.28     | 453                | 475                | 2B              | Wilcoxon signed-rank, paired, 2 tailed |
| D614G          | D614G.del69-70.N501Y | Convalescent                  | ID80               | 15          | 0.72                   | 0.74     | 218                | 219                | 2B              | Wilcoxon signed-rank, paired, 2 tailed |
| D614G          | D614G.del69-70.Y453F | MDP1.2                        | ID50               | 11          | 0.24                   | 0.30     | 1538               | 1365               | 2A              | Wilcoxon signed-rank, paired, 2 tailed |
| D614G          | D614G.del69-70.Y453F | Convalescent                  | ID50               | 15          | 0.012                  | 0.023    | 1105               | 343                | 2A              | Wilcoxon signed-rank, paired, 2 tailed |
| D614G          | D614G.del69-70.Y453F | MDP1.2                        | ID80               | 11          | 0.58                   | 0.62     | 453                | 351                | 2B              | Wilcoxon signed-rank, paired, 2 tailed |
| D614G          | D614G.del69-70.Y453F | Convalescent                  | ID80               | 15          | <b><u>0.0084</u></b>   | 0.017    | 218                | 122                | 2B              | Wilcoxon signed-rank, paired, 2 tailed |
| D614G          | D614G.N439K          | MDP1.2                        | ID50               | 11          | 0.76                   | 0.76     | 1538               | 1312               | 2A              | Wilcoxon signed-rank, paired, 2 tailed |
| D614G          | D614G.N439K          | Convalescent                  | ID50               | 15          | <b>0.00061</b>         | 0.0022   | 1105               | 688                | 2A              | Wilcoxon signed-rank, paired, 2 tailed |
| D614G          | D614G.N439K          | MDP1.2                        | ID80               | 11          | 0.46                   | 0.53     | 453                | 481                | 2B              | Wilcoxon signed-rank, paired, 2 tailed |
| D614G          | D614G.N439K          | Convalescent                  | ID80               | 15          | <b>0.00085</b>         | 0.0023   | 218                | 151                | 2B              | Wilcoxon signed-rank, paired, 2 tailed |
| D614G.N501Y    | D614G.del69-70.N501Y | MDP1.2                        | ID50               | 11          | 0.042                  | 0.065    | 1604               | 1804               | 2A              | Wilcoxon signed-rank, paired, 2 tailed |
| D614G.N501Y    | D614G.del69-70.N501Y | Convalescent                  | ID50               | 15          | <b><u>6.10E-05</u></b> | 0.00035  | 412                | 923                | 2A              | Wilcoxon signed-rank, paired, 2 tailed |
| D614G.N501Y    | D614G.del69-70.N501Y | MDP1.2                        | ID80               | 11          | <b><u>0.014</u></b>    | 0.024    | 347                | 475                | 2B              | Wilcoxon signed-rank, paired, 2 tailed |
| D614G.N501Y    | D614G.del69-70.N501Y | Convalescent                  | ID80               | 15          | <b>0.00018</b>         | 0.00090  | 128                | 219                | 2B              | Wilcoxon signed-rank, paired, 2 tailed |
| D614G.del69-70 | D614G.del69-70.N501Y | MDP1.2                        | ID50               | 11          | <b><u>0.042</u></b>    | 0.065    | 2896               | 1804               | 2A              | Wilcoxon signed-rank, paired, 2 tailed |
| D614G.del69-70 | D614G.del69-70.N501Y | Convalescent                  | ID50               | 15          | 0.52                   | 0.58     | 1244               | 923                | 2A              | Wilcoxon signed-rank, paired, 2 tailed |
| D614G.del69-70 | D614G.del69-70.N501Y | MDP1.2                        | ID80               | 11          | <b><u>0.014</u></b>    | 0.024    | 617                | 475                | 2B              | Wilcoxon signed-rank, paired, 2 tailed |
| D614G.del69-70 | D614G.del69-70.N501Y | Convalescent                  | ID80               | 15          | 0.064                  | 0.095    | 301                | 219                | 2B              | Wilcoxon signed-rank, paired, 2 tailed |
| D614G.del69-70 | D614G.del69-70.Y453F | MDP1.2                        | ID50               | 11          | <b>0.00098</b>         | 0.0023   | 2896               | 1365               | 2A              | Wilcoxon signed-rank, paired, 2 tailed |
| D614G.del69-70 | D614G.del69-70.Y453F | Convalescent                  | ID50               | 15          | <b><u>6.10E-05</u></b> | 0.00035  | 1244               | 343                | 2A              | Wilcoxon signed-rank, paired, 2 tailed |
| D614G.del69-70 | D614G.del69-70.Y453F | MDP1.2                        | ID80               | 11          | <b>0.00098</b>         | 0.0023   | 617                | 351                | 2B              | Wilcoxon signed-rank, paired, 2 tailed |
| D614G.del69-70 | D614G.del69-70.Y453F | Convalescent                  | ID80               | 15          | <b><u>6.10E-05</u></b> | 0.00035  | 301                | 122                | 2B              | Wilcoxon signed-rank, paired, 2 tailed |
| Moderna D29    | Moderna D57          | B.1.1.7                       | D614G/B.1.1.7_ID50 | 11, 29      | <b>0.00066</b>         | 0.0022   | 3.51               | 1.97               | 2C              | Wilcoxon rank sum, 2 tailed            |
| Moderna D29    | Moderna D57          | B.1.1.7                       | D614G/B.1.1.7_ID80 | 11, 29      | 0.59                   | 0.62     | 1.75               | 1.7                | 2C              | Wilcoxon rank sum, 2 tailed            |

<sup>a</sup>Group identifier: MDP1.1- Moderna Phase 1 Set 1; MDP1.2- Moderna Phase 1 set 2; NVVP1- Novavax Phase 1.

Underlined: p<0.01

**Bold:** p<0.001

**Bold and underlined:** p<0.0001

Grey shade: fold difference between median of two variables in comparison <1.3 and >0.77 (reflecting <30% difference in median values).



**Table S3.** Primers used for site-directed mutagenesis.

| Primer       | 5'-Sequence-3'                             |
|--------------|--------------------------------------------|
| H69-V70      | 5'-ccattggtgccgctgatggcgtggaacc-3'         |
| H69-V70-anti | 5'-ggttccacgccatcagcggcaccaatgg-3'         |
| N501Y        | 5'-agcccacgccatagtgtggctggaagccgtag-3'     |
| N501Yanti    | 5'-ctacggcttccagccaacataggcgtgggct-3'      |
| N439K        | 5'-tgctatccagattcttagagttccaggcgcacg-3'    |
| N439K-anti   | 5'-cgtgatcgcctggaactctaagaatctggatagca-3'  |
| Y453F        | 5'-ctaaacagccggaacagataattgtagtgtccgccc-3' |
| Y453F-anti   | 5'-ggcggaactacaattatctgttccggctgttag-3'    |
| A570D        | 5'-ggcgtctgtggtatcatcgatgtccctgccga-3'     |
| A570D_anti   | 5'-tcggcagggacatcgatgataccacagacgcc-3'     |
| P681H        | 5'-cagaccgtgctcctatgggagttgtctgggt-3'      |
| P681H-anti   | 5'-accagacaaactccataggagagcacggtctg-3'     |
| T716I        | 5'-cggagattgtgaagttgatagggatggcgatagaa-3'  |
| T716I-anti   | 5'-ttctatcgccatccctatcaactcacaatctccg-3'   |
| S982A        | 5'-cacctgtccagccggccaggatgtcattcagc-3'     |
| S982A-anti   | 5'-gctgaatgacatcctggcccggctggacaaggtg-3'   |
| D1118H       | 5'-cacgaatgtattgtgtggtgatgatctgtggc-3'     |
| D1118H-anti  | 5'-gccacagatcatcaccacacacaatacattcgtg-3'   |
| Y144-        | 5'-acttattgttctgtgatacagcccaggaatggatc-3'  |
| Y144-anti    | 5'-gatccattcctggcgtgtatcacaagaacaataagt-3' |
