# Supplementary material
Source: PubMed Central journal article supplement (PMC7934674)
Supplement: mmc3.pdf [file mmc3.pdf]

# Cell Host & Microbe

## SARS-CoV-2 variant B.1.1.7 is susceptible to neutralizing antibodies elicited by ancestral spike vaccines

### Graphical abstract

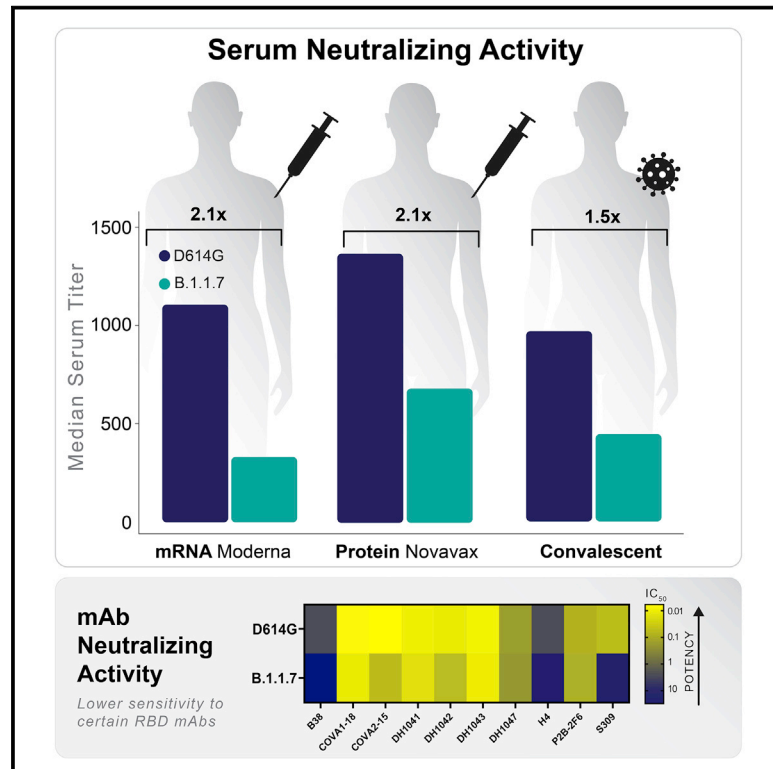

### Authors

Xiaoying Shen, Haili Tang, Charlene McDanal, ..., Gregory M. Glenn, Bette Korber, David C. Montefiori

### Correspondence

david.montefiori@duke.edu

### In brief

The increasing prevalence and diversity of SARS-CoV-2 spike variants raises concerns for potential immune escape. Using a validated pseudovirus neutralization assay, Shen et al. show that the B.1.1.7 variant escapes a subset of monoclonal antibodies but remains susceptible to vaccine-elicited antibodies and serum samples from people who recovered from COVID-19.

### Highlights

- B.1.1.7 is not a neutralization escape variant of concern for COVID-19 vaccines
- B.1.1.7 is unlikely to increase the risk of SARS-CoV-2 reinfection
- B.1.1.7 escapes a subset of RBD-specific antibodies

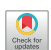

## Short Article

# SARS-CoV-2 variant B.1.1.7 is susceptible to neutralizing antibodies elicited by ancestral spike vaccines

Xiaoying Shen,<sup>1,2</sup> Haili Tang,<sup>1</sup> Charlene McDanal,<sup>1</sup> Kshitij Wagh,<sup>3</sup> William Fischer,<sup>3</sup> James Theiler,<sup>3</sup> Hyejin Yoon,<sup>3</sup> Dapeng Li,<sup>2</sup> Barton F. Haynes,<sup>2,6</sup> Kevin O. Sanders,<sup>1,2</sup> Sandrasegaram Gnanakaran,<sup>3</sup> Nick Hengartner,<sup>3</sup> Rolando Pajon,<sup>4</sup> Gale Smith,<sup>5</sup> Gregory M. Glenn,<sup>5</sup> Bette Korber,<sup>3</sup> and David C. Montefiori<sup>1,2,7,\*</sup>

<sup>1</sup>Department of Surgery, Duke University School of Medicine, Durham, NC, USA

<sup>2</sup>Duke Human Vaccine Institute, Duke University School of Medicine, Durham, NC, USA

<sup>3</sup>Theoretical Biology and Biophysics, Los Alamos National Laboratory, Los Alamos, NM, USA

<sup>4</sup>Moderna, Inc., Cambridge, MA, USA

<sup>5</sup>Novavax, Inc., Gaithersburg, MD, USA

<sup>6</sup>Department of Medicine, Duke University Medical Center, Durham, NC, USA

<sup>7</sup>Lead contact

\*Correspondence: [david.montefiori@duke.edu](mailto:david.montefiori@duke.edu)

<https://doi.org/10.1016/j.chom.2021.03.002>

## SUMMARY

All current vaccines for COVID-19 utilize ancestral SARS-CoV-2 spike with the goal of generating protective neutralizing antibodies. The recent emergence and rapid spread of several SARS-CoV-2 variants carrying multiple spike mutations raise concerns about possible immune escape. One variant, first identified in the United Kingdom (B.1.1.7, also called 20I/501Y.V1), contains eight spike mutations with potential to impact antibody therapy, vaccine efficacy, and risk of reinfection. Here, we show that B.1.1.7 remains sensitive to neutralization, albeit at moderately reduced levels (~2-fold), by serum samples from convalescent individuals and recipients of an mRNA vaccine (mRNA-1273, Moderna) and a protein nanoparticle vaccine (NVX-CoV2373, Novavax). A subset of monoclonal antibodies to the receptor binding domain (RBD) of spike are less effective against the variant, while others are largely unaffected. These findings indicate that variant B.1.1.7 is unlikely to be a major concern for current vaccines or for an increased risk of reinfection.

## INTRODUCTION

Genetic evolution in the SARS-CoV-2 virus (severe acute respiratory syndrome coronavirus 2) is an increasing concern for the COVID-19 (coronavirus disease 2019) pandemic. Continued high infection rates are providing opportunities for the virus to acquire mutations that contribute to virus spread and possible immune evasion. Mutations in the viral spike are a particular concern because this glycoprotein mediates virus attachment and entry (Ou et al., 2020) and is the major target for neutralizing antibodies (Piccoli et al., 2020). The D614G spike variant that spread rapidly during March and April of 2020 (Biswas and Majumder, 2020; Isabel et al., 2020) was found in most sequences globally by June 2020 and is the earliest evidence for adaptive evolution of this virus in humans. The D614G mutation imparts increased infectivity *in vitro* (Hou et al., 2020; Korber et al., 2020), accelerated transmission in hamsters (Hou et al., 2020), and shows a modest increase in neutralization susceptibility (Weissman et al., 2021), all of which are explained by a more open conformation of the receptor binding domain (RBD) (Weissman et al., 2021; Yurkovetskiy et al., 2020). The mutation does not appear to increase disease severity despite an associ-

ation with higher virus loads in respiratory secretions (Korber et al., 2020). Notably, several vaccines proved highly efficacious in phase 3 trials conducted while D614G was the dominant variant in the global pandemic (Baden et al., 2020; Polack et al., 2020; Voysey et al., 2021).

Newer variants with additional mutations are spreading rapidly in the UK (variant B.1.1.7, also called 20I/501Y.V1), South Africa (variant B.1.351, also called 20H/501Y.V2), Brazil (variant B.1.1.248, also called P.1 and 20J/501Y.V3), and California (variant B.1.429, also called Cal.20C and 452R.V1) (Figure S1; for daily updates of the global sampling of these variants, see GISAID's "Tracking of Variants" page: <https://www.gisaid.org/hcov19-variants/>) (Tegally et al., 2020; Zhang et al., 2021; Naveca et al., 2021; Rambaut et al., 2020). Among them, the B.1.1.7 lineage of SARS-CoV-2 has caused public health concern because of its high rate of transmission in the UK (Rambaut et al., 2020). This variant contains 17 non-synonymous mutations, including the D614G mutation and 8 additional mutations in spike:  $\Delta$ H69-V70,  $\Delta$ Y144, N501Y, A570D, P681H, T716I, S982A, and D1118H. Three B.1.1.7 spike mutations are of particular concern: a two-amino-acid deletion at position 69-70 of the N-terminal domain (NTD); N501Y, located in the receptor binding

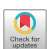

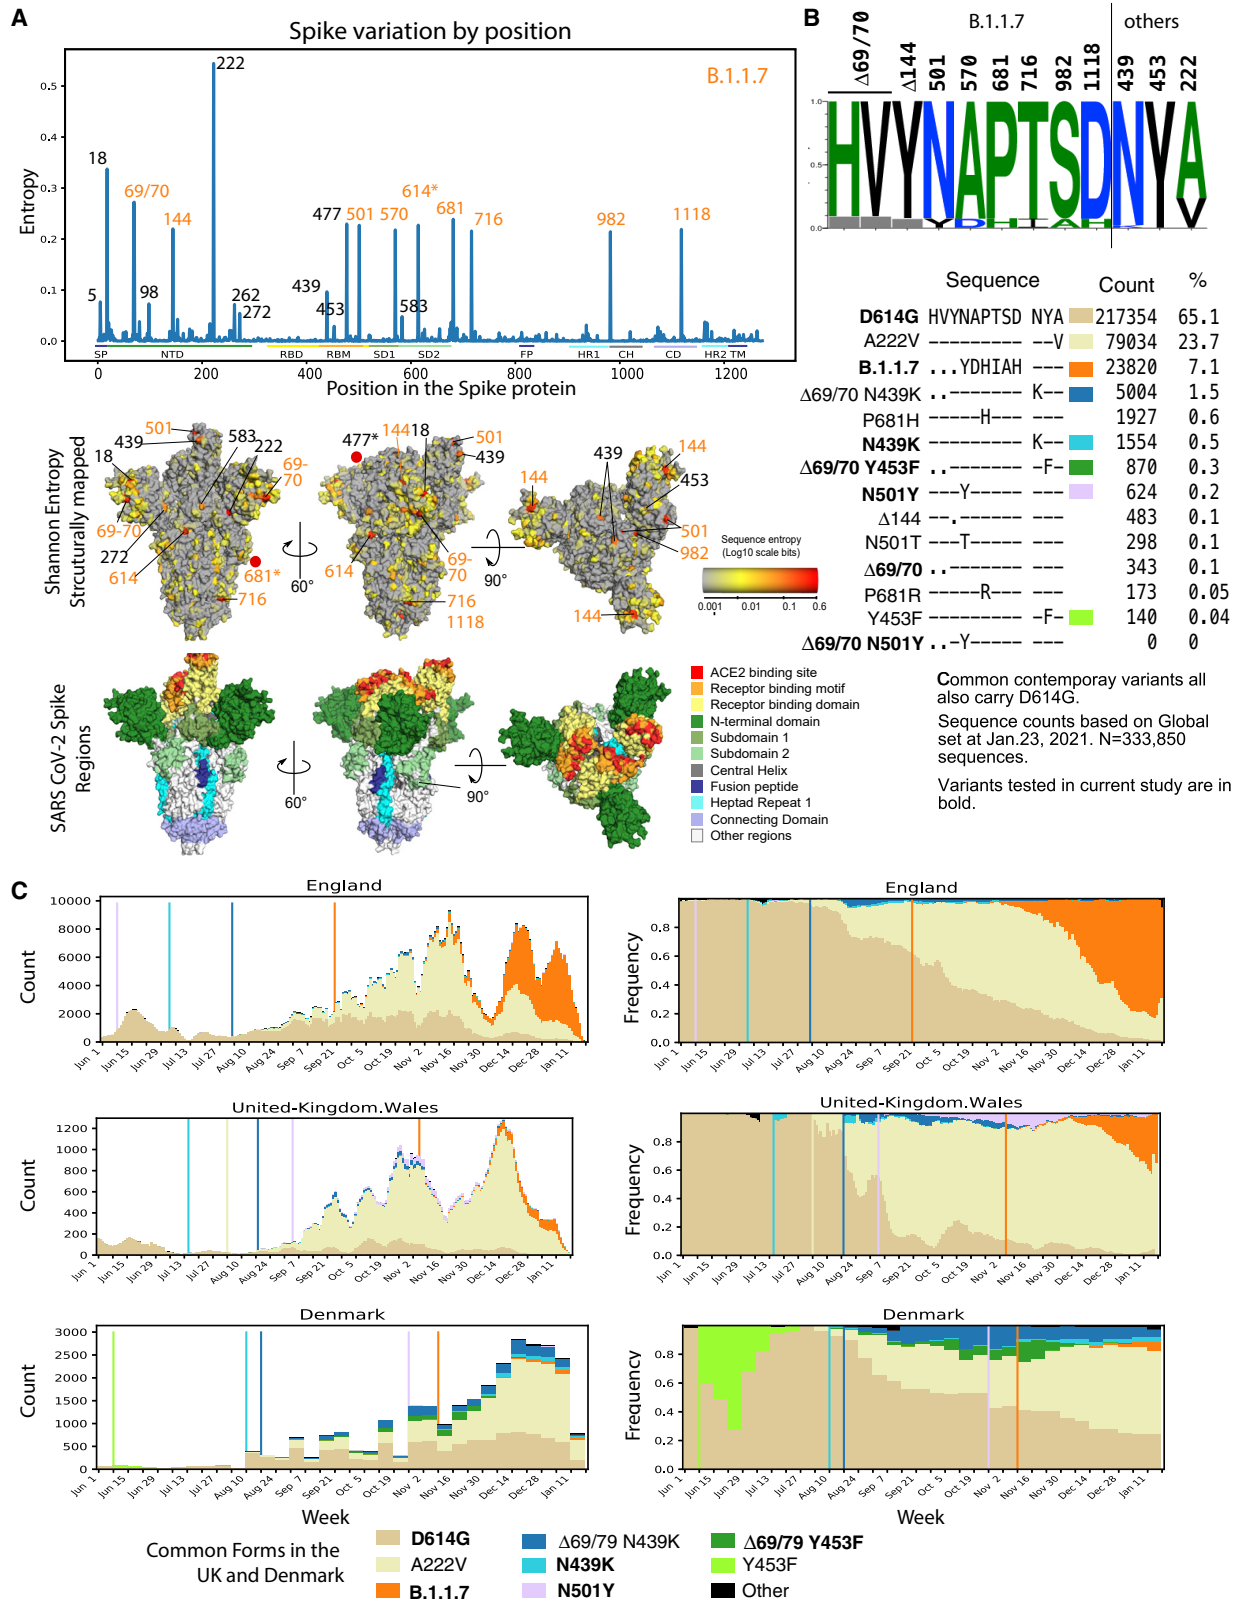

**Figure 1. Epidemiology tracing of mutations in B.1.1.7 and co-circulating relevant mutations in the UK and Danish SARS-CoV-2 epidemics** (A) Entropy scores summarizing the level of diversity found in positions in spike. These scores are dependent on sampling, and recent sampling from the UK and Denmark has been particularly intense relative to other regions of the world (Figure S1). B.1.1.7 mutations are highlighted in orange. The subset of B.1.1.7 sites

(legend continued on next page)

motif (RBM); and P681H, proximal to the furin cleavage site (Rambaut et al., 2020). Each of these three mutations are also found in other variants of interest. Epidemiological evidence and mathematical modeling data suggest the variant is more transmissible than the SARS-CoV-2 variants that were circulating prior to its introduction (Figure 1) (Davies et al., 2020; Public Health England, 2021; Galloway et al., 2021; Volz et al., 2021) and, though initially reported as not more pathogenic (Public Health England, 2020), evidence of increased mortality rate has also been reported (NERVTAG, 2021). As mutations in spike have potential to alter virus infectivity and/or susceptibility to neutralizing antibodies, one critical question is whether this B.1.1.7 variant will evade current vaccines, all of which are based on ancestral spike.

Here, we assessed the neutralization phenotype of the B.1.1.7 variant using convalescent sera, monoclonal antibodies (mAbs), and serum samples from phase 1 trials of an mRNA-based vaccine (mRNA-1273, Moderna) and a protein nanoparticle vaccine (NVX-CoV2373, Novavax). In addition, we characterized another two RBD mutations, N439K and F453Y, that showed limited circulation in both Denmark and the UK preceding the circulation of the B.1.1.7 variant; these RBD mutations are each most often found coupled with the same  $\Delta$ H69-V70 that is in B.1.1.7.

## RESULTS

### Rationale for testing B.1.1.7 variant and select subvariants

B.1.1.7 contains eight mutations in spike (Figure 1), and the lineage is associated with many additional mutations throughout the SARS-CoV-2 genome (Figure S2). Among the spike mutations, N501Y is suggested to increase RBD interaction with its cellular receptor, angiotensin-converting enzyme 2 (ACE2) (Santos and Passos, 2021), and has been shown to be critical for adaptation of SARS-CoV-2 to infect mice (Gu et al., 2020). N501Y has twice reached frequencies between 10%–20% in local populations as a single mutation in a D614G spike backbone (once in Wales, Figures 1C and S1, and also once in Victoria, Australia), but in these cases it did not persist. N501Y is also evident in a distinctive variant that is increasing in frequency in South Africa, 501Y.V2 (B.1.351), and accompanies other mutations in spike that can confer partial resistance to convalescent sera (Wang et al., 2021; Wibmer et al., 2021) and vaccine sera (Wang et al., 2021; Wu et al., 2021). A double deletion of amino acids H69-V70 in the N-terminal domain (NTD) of spike often co-occurs with one of three mutations in RBD: N501Y, N439K, or Y453F

(Kemp et al., 2020). Y453F is associated with a mink farm outbreak in Denmark, with and without the presence of a  $\Delta$ H69-V70 deletion (Kemp et al., 2020; van Dorp et al., 2020), but is also found in people in Denmark and the UK (Figure 1). N439K mutation usually occurs with  $\Delta$ H69-V70, but occurs frequently without the  $\Delta$ H69-V70 mutation as well. Y453F and N439K have been reported to escape neutralization by REGN10933 (Baum et al., 2020) and REGN10987 (Thomson et al., 2020) respectively, the two mAbs that comprise the REGN-COV2 cocktail regimen (Weinreich et al., 2021). Neither N439K nor Y453F is resistant to both of the REGN-COV2 mAbs, indicating involvement of the two sites in interactions with different RBD mAb species. N439K has also been reported to resist neutralization while maintaining virus fitness/infectivity (Li et al., 2020; Thomson et al., 2020). Another mutation of obvious concern in B.1.1.7 is P681H, proximal to the furin cleavage site (Figures 1C, S2, and S3) that has arisen many times independently (Figure S1) and has come to dominate the local epidemic in Hawaii.

### Neutralization of variant B.1.1.7 by serum from convalescent individuals and vaccine recipients

SARS-CoV-2 variant B.1.1.7 was compared to the D614G variant in neutralization assays with serum samples from 15 COVID-19 convalescent individuals, 40 recipients of the Moderna mRNA-1273 vaccine (11 samples from 29 days post-first inoculation, day 29; 29 samples from 28 days post-second inoculation, day 57), and 28 recipients of the Novavax spike protein nanoparticle vaccine NVX-CoV2373 (2 weeks post-second inoculation). Selection of NVX-CoV2373 vaccine serum samples was random and not pre-selected based on any selection criterion of anti-spike or neutralizing titers. The B.1.1.7 variant was neutralized by all vaccine sera, although with modestly diminished susceptibility compared to the D614G variant (Figures 2A and 2B). A modest decrease in neutralization susceptibility was also seen with convalescent sera, although not to the same extent seen with vaccine sera. Median ID50 titers of sera from both phase 1 vaccine trials were on average 2.1-fold lower against B.1.1.7 than against D614G (Table S1). The fold difference in ID50 titer ranged from 0.36 to 8.62 for Moderna sera, with an interquartile range (IQR) of 1.6 to 2.9. The fold difference in ID50 titers ranged from 0.85 to >20 for Novavax sera, with an IQR of 1.5 to 3.0. Median ID80 titers of sera from both phase 1 trials were on average 1.7-fold lower against B.1.1.7 than against D614G (Table S1), with a tighter range of fold difference compared to ID50. The fold difference in ID80 ranged from 0.91 to 3.21 for Moderna

with greater entropy scores (69/70, 681, and 501) are also often found in the context of other variants. The most variable site in spike is at 222 and is indicative of the GV clade. G614 has dominated global sampling since June 2020, and the entropy at 614 reflects presence of the ancestral form, D614, sampled in the early months of the pandemic. These same entropy scores are first mapped by linear position in the protein and then mapped onto the spike structure below the graph. Regions of spike are indicated by the same colors in the linear and structural maps.

(B) Frequencies of variants in relevant positions. Using the Analyze Align (AA) tool at [cov.lanl.gov](http://cov.lanl.gov), we extracted the columns of interest for the B.117 spike mutations, and the additional sites of interest at 439, 453, and 222, out of a 333,850-sequence set extracted from GISAID on January 23, 2021. The logo at the top indicates the AA frequency in the full dataset; the gray boxes indicate deletions. All common forms of combinations of mutations at these sites of interest are shown, followed by their count and percentage. The forms that were common in the UK and Denmark are each assigned a color and used to map transition in frequencies of these forms over time in (C).

(C) Weekly running averages for each of the major variants in the UK and Denmark, based on the variants shown in (B), are plotted; the actual counts are on the left, and relative frequencies on the right. Some windows in time are very poorly sampled, some very richly. The vertical lines indicate when a variant is first sampled in a region. Note the lavender N501Y in Wales; this is N501Y found out of the context of B.1.1.7 and transient. The shifts in relative prevalence from the G clade (beige, D614G) to the GV clade (cream, A222V) to the B.1.1.7 variants (orange) are shown.

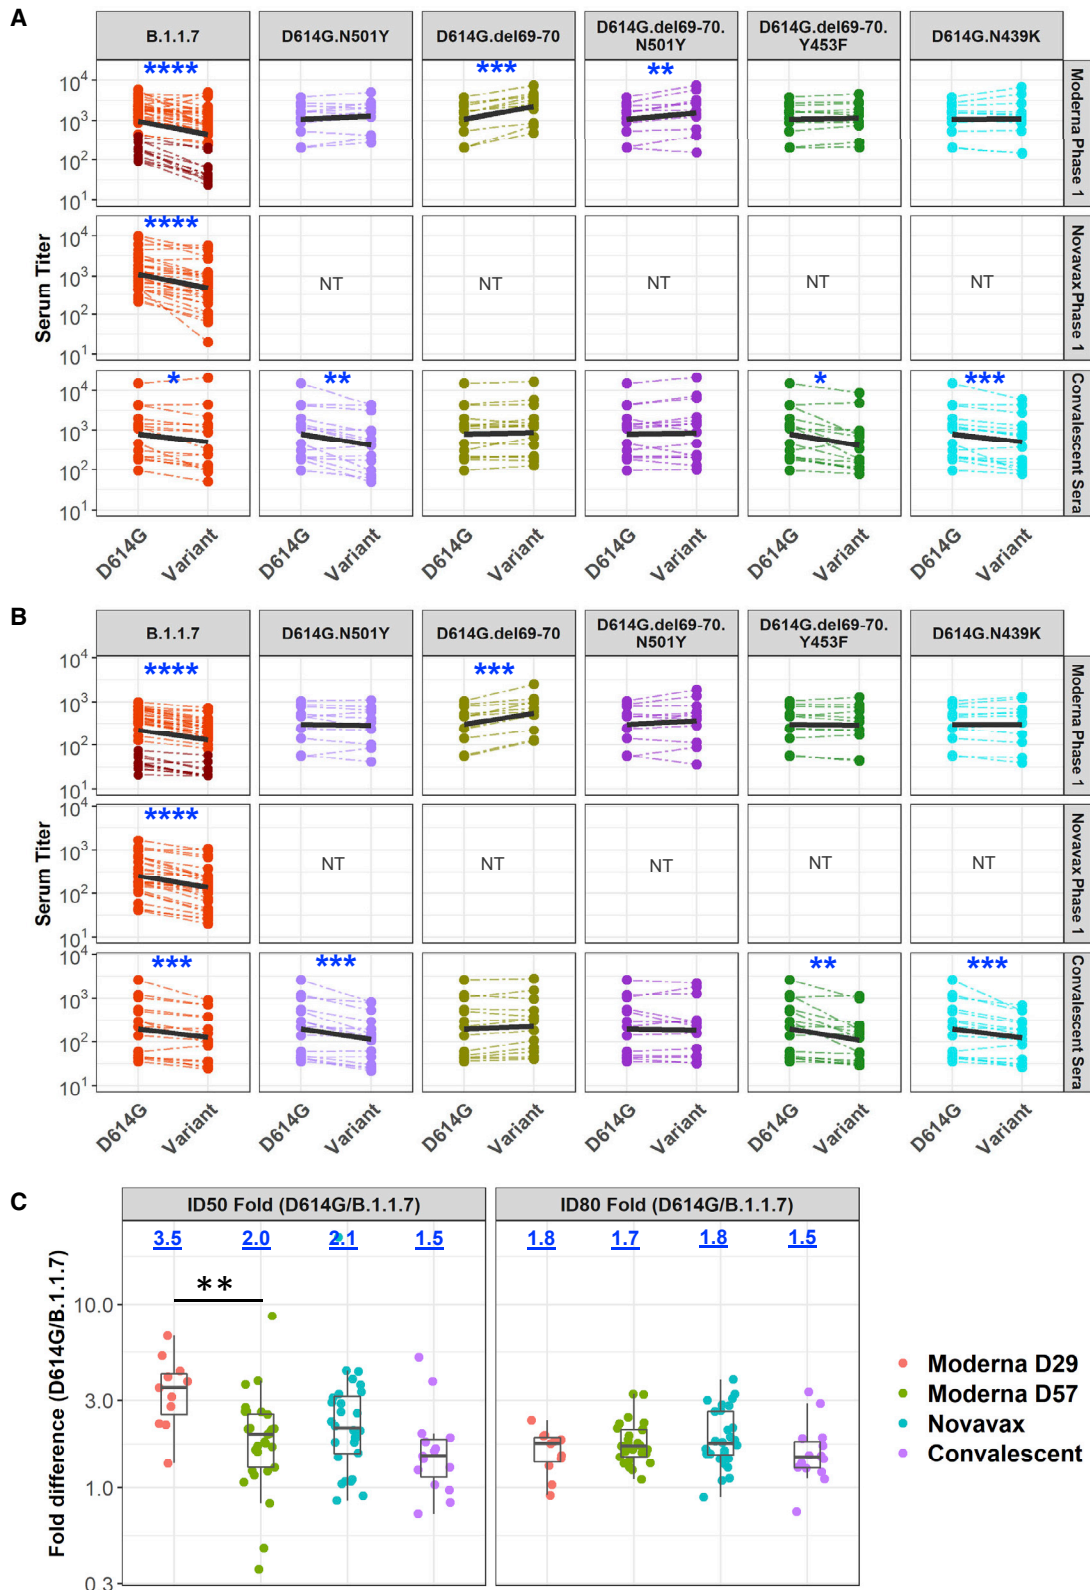

**Figure 2. Neutralization of variants by vaccine and convalescent sera**

(A and B) Serum ID50 (A) and ID80 (B) titers of neutralization of each variant relative to D614G by vaccine sera (top 2 rows) and convalescent sera. Dashed thin lines represent individual samples; thick black lines represent geometric means of each sample group as indicated on the right. NT, not tested. Samples in dark and light red colors in the Moderna panel against B.1.1.7 are D29 and D57 samples, respectively. See also [Table S1](#).

(legend continued on next page)

sera, with an IQR of 1.4 to 1.9. The fold difference in ID80 titer ranged from 0.89 to 3.98 for Novavax, with an IQR of 1.5 to 2.6. Convalescent sera showed an average of 1.5-fold (group median) lower ID50 titer against the B.1.1.7 variant (range 0.7 to 5.5; IQR = 1.1 to 1.8) and 1.5-fold (group median) lower ID80 titer (range 0.7 to 3.3; IQR = 1.3 to 1.8). The fold differences were statistically significant with  $p < 0.0001$  for both ID50 and ID80 for Moderna and Novavax phase 1 sera, and  $p < 0.001$  for ID80 of both sets of vaccine sera and the convalescent sera (Wilcoxon signed-rank test, paired, two-tailed; false discovery rate [FDR] corrected  $q$  values  $< 0.1$ , corresponding to  $p < 0.064$  in this study, were considered as significant) (Figures 2A and 2B; Table S2).

Notably, sera with weaker neutralizing activity from the Moderna trial exhibited a more substantial reduction in activity against the B.1.1.7 variant. Because most low-titer samples in this trial were from day 29 (single inoculation), we compared the change in neutralization titers for day 29 and day 57 samples from the Moderna trial, as well as all samples from the Novavax trial, and from convalescent individuals (Figure 2C). The day 29 samples from the Moderna trial exhibited the greatest decrease in ID50 titer among the sample sets, and the decrease was significantly larger than the decrease for day 57 samples against the B.1.1.7 variant (Table S1;  $p = 0.0007$ ), suggesting that antibody maturation can alleviate neutralization resistance.

### Neutralization of additional variants by serum from convalescent individuals and vaccine recipients

To gain insights into whether the reduced neutralization susceptibility of the B.1.1.7 variant was due to a single spike mutation or a combination of two or more spike mutations, we characterized B.1.1.7 subvariants containing either N501Y alone,  $\Delta$ H69-V70 alone, and a combination of N501Y+ $\Delta$ H69-V70, each in the D614G background. We also tested  $\Delta$ H69-V70+Y453F and N439K in the D614G background because  $\Delta$ H69-V70 is commonly shared with these mutations; they were first identified in association with recent outbreaks in minks and zoonotic transmission to humans in Denmark. Due to limited supplies, sera from the Novavax phase 1 trial were not included in these assays. Interestingly, the  $\Delta$ H69-V70 mutation rendered the virus more susceptible to neutralization by Moderna (mRNA-1273 vaccine) sera but not convalescent sera (Figure 2). Median ID50 and ID80 titers for Moderna sera were 2-fold higher against D614G. $\Delta$ H69-V70 than against D614G ( $p < 0.001$ ), while titers of convalescent sera were comparable to D614G (Figures 2A and 2B; Table S2). N501Y had no significant impact on susceptibility to Moderna sera but did impart modest resistance to convalescent sera (Figure 2). Median ID50 and ID80 titers for convalescent sera against the N501Y variant were 2.2- and 1.8-fold lower ( $p < 0.01$  and  $p < 0.001$  for ID50 and ID80), while titers for Moderna sera were comparable to D614G (Figures 2A and 2B; Table S2). When both the  $\Delta$ H69-V70 deletion and the N501Y mutation were present, the increase in susceptibility caused by  $\Delta$ H69-V70 was diminished but still significant. No significant difference in

neutralization titers was observed when both the  $\Delta$ H69-V70 deletion and the N501Y mutation were present, except for a statistically significant ( $p < 0.01$ ) but minimal 1.18-fold increase in ID50 titer of Moderna sera against D614G. $\Delta$ H69-V70.N501Y compared to D614G (Figures 2A and 2B; Table S2). The variant with both the  $\Delta$ H69-V70 deletion and the Y453F mutation showed decreased neutralization susceptibility to convalescent sera, but not Moderna sera. Median ID50 and ID80 titers for convalescent sera were 1.7- and 1.5-fold lower against D614G. $\Delta$ H69-V70.Y453F than against D614G ( $p = 0.012$  [ $q = 0.026$ ] and  $p < 0.001$ , respectively) (Figures 2A and 2B; Table S2). When neutralization titers for variants with and without the Y453F mutation were compared, median ID50 titers of Moderna and convalescent sera were 2.1- and 3.6-fold lower, respectively, against D614G. $\Delta$ H69-V70.Y453F than against D614G. $\Delta$ H69-V70 ( $p < 0.001$  and  $p < 0.0001$ , respectively) (Table S2). Median ID80 titers also were significantly lower for Moderna and convalescent sera against D614G. $\Delta$ H69-V70.Y453F than against D614G. $\Delta$ H69-V70 (1.8- and 2.5-fold;  $p < 0.01$  and  $p < 0.001$ , respectively) (Table S2). Therefore, Y453F mutation can reverse the increased susceptibility conferred by the  $\Delta$ H69-V70 mutation, demonstrating cooperative interactions between the RBD and NTD of spike. The D614G.N439K variant showed neutralization titers comparable to D614G for Moderna sera, and slight (1.6- and 1.4-fold) but significant ( $p < 0.001$ ) decrease in ID50 and ID80 titers for convalescent sera (Figures 2A and 2B; Table S2).

### Neutralization by mAbs

Neutralization of the B.1.1.7 variant and corresponding subvariants was assessed with a panel of RBD-targeting mAbs: DH1041, DH1042, DH1043, DH1047, B38, H4, P2B-2F6, COVA1-18, COVA2-15, and S309. The B.1.1.7 variant showed greatest resistance to mAbs B38, COVA2-15, and S309 ( $>10$ -fold difference in either IC50 or IC80 concentration compared to D614G) (Table 1). Resistance to B38 could not be fully explained by N501Y,  $\Delta$ H69-V70, or the combination of these two mutations, whereas resistance to COVA2-15 and COVA1-18 was largely due to N501Y. Resistance to S309 was associated with N501Y, although this mutation alone accounted for only part of the resistance seen with the complete B.1.1.7 variant. The complete set of mutations and subsets of mutations in B.1.1.7 tested here had little (4.7-fold reduction in IC50 for DH1042 and H4) or no impact on other RBD antibodies (Table 1).

The mAbs were largely unaffected by the Y453F and N439 mutations (Table 1). A modest increased sensitivity was seen in two cases: DH1047 assayed against D614G.N439K, and H4 assayed against D614G. $\Delta$ H69-V70.Y453F. The latter variant also exhibited partial resistance to S309, which was mostly seen at IC80, and the level of change was similar to that caused by the  $\Delta$ H69-V70 deletion alone, indicating that the deletion is the cause of the decreased susceptibility rather than the Y453F.

We used structural analyses to understand the molecular mechanisms of mAb neutralization resistance or lack thereof.

(C) Fold decline of ID50 (left) and ID80 (right) titers for each variant over D614G (D614G/variant) for each serum sample set as identified. Numbers on top of each plot show median fold differences. Upper and lower border of each box represent IQR of the fold differences, respectively, and the middle bars in boxes represent group median. Statistical significance of comparisons are indicated in all panels as \* $p < 0.05$  ( $p < 0.064$  corresponds to  $q < 0.1$ ), \*\* $p < 0.01$ , \*\*\* $p < 0.001$ , and \*\*\*\* $p < 0.0001$ . Wilcoxon signed-rank paired test for (A and B); Wilcoxon rank-sum test for (C). See also Table S2.

**Table 1. Neutralization of variants by mAbs**

| Virus                | Value <sup>a</sup> | mAbs       |               |               |               |               |               |              |             |              |              |
|----------------------|--------------------|------------|---------------|---------------|---------------|---------------|---------------|--------------|-------------|--------------|--------------|
|                      |                    | B38        | COVA1-18      | COVA2-15      | DH1041        | DH1042        | DH1043        | DH1047       | H4          | P2B-2F6      | S309         |
| D614G                | IC50               | 2.10       | 0.0060        | 0.0058        | 0.0094        | 0.011         | 0.0081        | 0.14         | 2.10        | 0.071        | 0.048        |
|                      | IC80               | 12.00      | 0.031         | 0.028         | 0.036         | 0.068         | 0.040         | 0.54         | 18.00       | 1.20         | 0.69         |
| D614G.B117           | IC50               | 30 (14.2x) | 0.011 (1.8x)  | 0.05 (8.7x)   | 0.015 (1.6x)  | 0.052 (4.7x)  | 0.01 (1.3x)   | 0.17 (1.2x)  | 9.9 (4.7x)  | 0.075 (1.1x) | 9.2 (191.4x) |
|                      | IC80               | >50 (> 4x) | 0.16 (5.1x)   | 0.95 (34.5x)  | 0.039 (1.1x)  | 0.13 (1.9x)   | 0.05 (1.3x)   | 0.64 (1.2x)  | >50 (> 3x)  | 2.2 (1.8x)   | >50 (> 72x)  |
| D614G.N501Y          | IC50               | 4.7 (2.2x) | 0.032 (5.2x)  | 0.084 (14.6x) | 0.01 (1.1x)   | 0.012 (1.1x)  | 0.015 (1.8x)  | 0.072 (0.5x) | 3.7 (1.7x)  | 0.043 (0.6x) | 0.15 (3.1x)  |
|                      | IC80               | >50 (> 4x) | 0.19 (6.1x)   | 0.93 (33.8x)  | 0.034 (1x)    | 0.06 (0.9x)   | 0.058 (1.5x)  | 0.43 (0.8x)  | 46 (2.5x)   | 0.93 (0.8x)  | >50 (> 72x)  |
| D614G.del69-70       | IC50               | 1.5 (0.7x) | 0.0042 (0.7x) | 0.0051 (0.9x) | 0.007 (0.8x)  | 0.0095 (0.9x) | 0.0077 (0.9x) | 0.1 (0.7x)   | 2.5 (1.2x)  | 0.1 (1.4x)   | 0.018 (0.4x) |
|                      | IC80               | 9.9 (0.8x) | 0.026 (0.8x)  | 0.026 (0.9x)  | 0.029 (0.8x)  | 0.053 (0.8x)  | 0.033 (0.8x)  | 0.5 (0.9x)   | 26 (1.4x)   | 1.1 (0.8x)   | 18 (26.8x)   |
| D614G.del69-70.N501Y | IC50               | 2.5 (1.2x) | 0.026 (4.3x)  | 0.051 (8.8x)  | 0.0044 (0.5x) | 0.0061 (0.6x) | 0.0074 (0.9x) | 0.049 (0.4x) | 3.1 (1.5x)  | 0.033 (0.5x) | 0.11 (2.2x)  |
|                      | IC80               | 40 (3.3x)  | 0.18 (5.8x)   | 11.6 (56.4x)  | 0.025 (0.7x)  | 0.039 (0.6x)  | 0.035 (0.9x)  | 0.28 (0.5x)  | 30 (1.6x)   | 1.0 (0.8x)   | >50 (> 72x)  |
| D614G.del69-70.Y453F | IC50               | 1.2 (0.5x) | 0.0083 (1.4x) | 0.0055 (0.9x) | 0.0046 (0.5x) | 0.004 (0.4x)  | 0.011 (1.4x)  | 0.048 (0.3x) | 0.64 (0.3x) | 0.094 (1.3x) | 0.098 (2x)   |
|                      | IC80               | 15 (1.3x)  | 0.043 (1.4x)  | 0.03 (1.1x)   | 0.027 (0.8x)  | 0.03 (0.5x)   | 0.05 (1.3x)   | 0.24 (0.4x)  | 5.7 (0.3x)  | 1.3 (1x)     | 11 (15.5x)   |
| D614G.N439K          | IC50               | 1.3 (0.6x) | 0.0061 (1x)   | 0.011 (1.9x)  | 0.0075 (0.8x) | 0.0063 (0.6x) | 0.017 (2.1x)  | 0.016 (0.1x) | 3.6 (1.7x)  | 0.15 (2.2x)  | 0.046 (0.9x) |
|                      | IC80               | 19 (1.6x)  | 0.049 (1.6x)  | 0.1 (3.8x)    | 0.035 (1x)    | 0.07 (1x)     | 0.059 (1.5x)  | 0.33 (0.6x)  | 42 (2.3x)   | 1.6 (1.3x)   | 0.38 (0.6x)  |

Numbers in parentheses followed by “x” represent fold differences over D614G. NA signifies data not available. >3-fold increase in IC50 or IC80 concentration over D614G represents moderate decrease in susceptibility. >10-fold increase in IC50 or IC80 concentration over D614G represents substantial decrease in susceptibility. <0.33-fold of the IC50 or IC80 of D614G represents moderate increase in susceptibility.

<sup>a</sup>Unit of IC50 and IC80 concentrations is  $\mu\text{g/mL}$ .

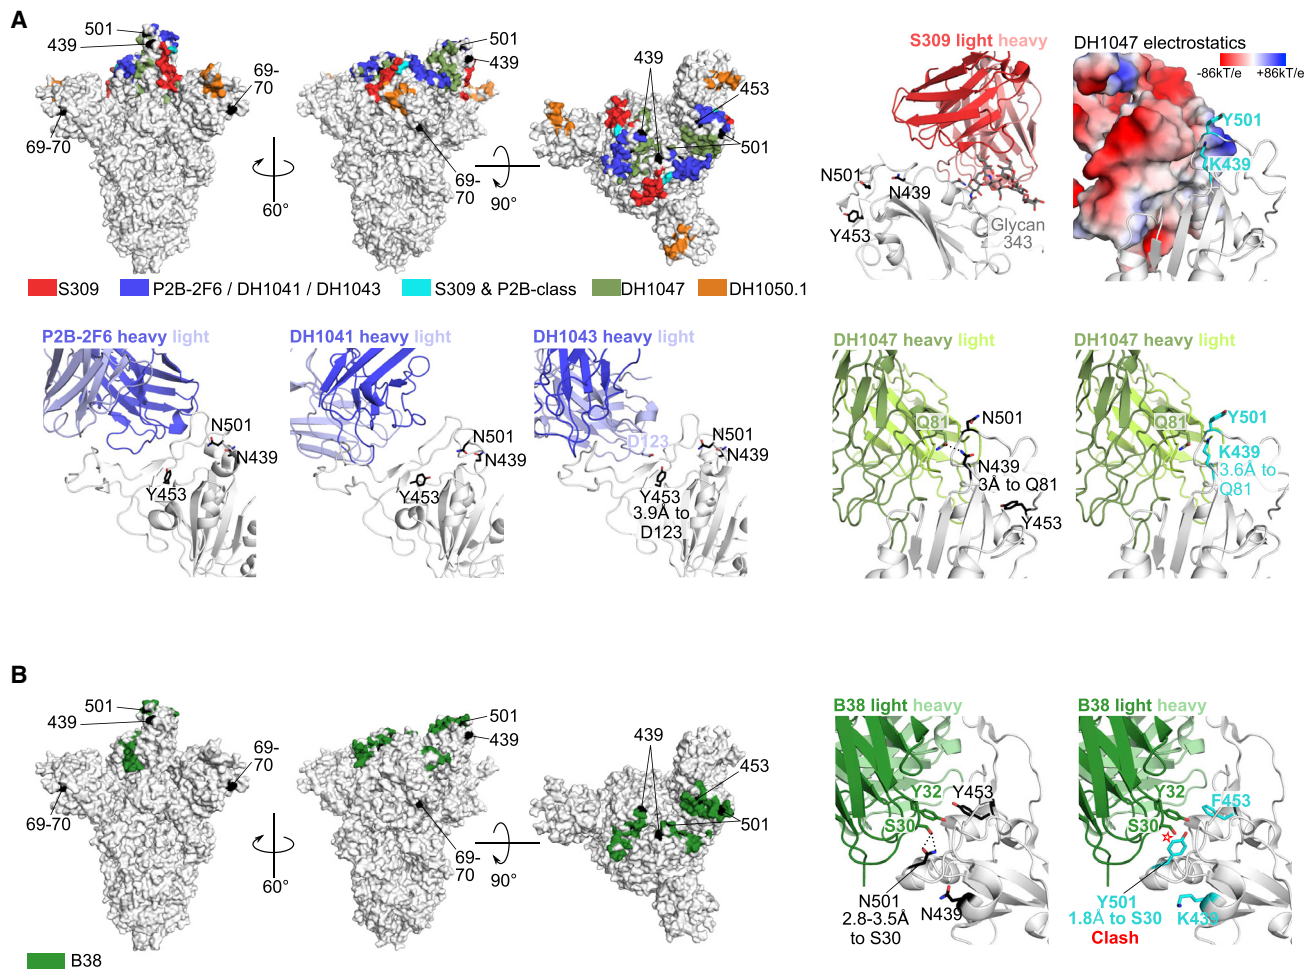

**Figure 3. Structural analyses for antibody resistance mutations**

(A) Three top left panels: full spike trimer with antibody epitopes for S309, P2B-2F6, DH1041, DH1043, DH1047, and DH1050.1. Epitopes for P2B-2F6, DH1041, and DH1043 are similar and are grouped together. Top row, second from right panel shows location of spike sites 439, 453, and 501 with respect to S309. These spike sites are not close to S309 (>11Å). Top row rightmost panel shows the DH1047 antibody colored according to vacuum electrostatic potential and the modeled mutations at spike sites Lys-439 and Tyr-501. Bottom row, rightmost two panels: DH1047 interaction with sites 439, 453, and 501 using wild-type amino acids (second from right) and modeled mutations (rightmost). Bottom row, three left panels: the location of spike sites 439, 453, and 501 with P2B-2F6, DH1041, and DH1043. Polar interactions between antibody and spike residues of interest are shown with dotted black lines.

(B) Similar to (A), except with B38 antibody. The modeled Tyr-501 is predicted to clash with light chain Ser-30 (~1.8Å, red star).

Mapping of the mAb epitopes (<4Å) on the spike trimer showed that the RBD mutations were within, or close to, the epitopes of all RBD antibodies, while ΔH69-V70 is in the NTD (Figure 3). N501Y and Y453F are in close proximity to the B38 paratope. Modeling of the N501Y mutation showed a potential clash between Y501 in spike and S-30 in B38 light chain, consistent with the neutralization resistance of N501Y to B38. mAbs P2B-2F6, DH1041, and DH1043 had very similar epitopes and were grouped together (P2B-class in Figure 3A; also similar to class 2 RBD mAbs) (Barnes et al., 2020). The RBD mutations were further from the P2B-2F6 and DH1041 paratopes, explaining the lack of impact of these mutations. Y453 is close (3.9Å) to the DH1043 paratope but with no predicted polar interactions. Structural modeling of N439K suggests a potentially more favorable interaction as Lys interacts with a negatively charged patch on the DH1047 surface. Although N501 is close to the DH1047

paratope, its side chain is oriented away from the mAb, suggesting no substantial impact due to N501Y. Y453 is also in close proximity to the B38 paratope, but structural modeling showed no substantial impact.

The decreased neutralization observed for S309 by ΔH69-V70 and N501Y could not be explained by structural analyses. Both the RBD mutations and ΔH69-V70 are distal from S309 (>11Å), suggesting allosteric interactions. Notably, S309 is the only mAb in this study that interacts strongly with a glycan (at site 343), and changes in spike dynamics or conformations can impact glycan processing (Wagh et al., 2020).

## DISCUSSION

Recent months have seen the emergence of a growing number of novel SARS-CoV-2 variants that can rapidly and repeatedly



shift in prevalence in local populations and even globally (Hodcroft et al., 2020; Korber et al., 2020). Newer variants carry multiple spike mutations (Naveca et al., 2021; Rambaut et al., 2020; Tegally et al., 2020) that are a potential concern for immune escape. The B.1.1.7 variant studied here was first detected in England in September 2020, where it rapidly came to dominate the regional pandemic and has now been detected in over 70 countries. Variants in the UK and Denmark followed a shifting dynamic, starting with the emergence of the G clade as the dominant form, followed by increasing prevalence of the GV clade that mirrored across Europe (Hodcroft et al., 2020), and then regional appearance of variants that carried combinations of  $\Delta$ H69-V70 with Y453F and N439K, finally to be followed by the introduction of the B.1.1.7 variant, which rapidly rose to dominance in the UK and is now beginning to increase in frequency in Denmark. The serial waves of variant prevalence in these two countries suggest complex dynamics that may come into play as SARS-CoV-2 continues to evolve. Furthermore, co-circulation of major variants in a geographically local region may enable recombination (Varabyou et al., 2020), bringing together mutations that enhance fitness either through infectivity or immunological resistance.

Prior to the emergence of this variant, two SARS-CoV-2 vaccines based on ancestral spike proved highly effective and recently received emergency use authorization, including the Moderna mRNA-1273 vaccine studied here (Baden et al., 2020) and a similar mRNA vaccine developed by Pfizer/BioNTek (Polack et al., 2020). Another vaccine based on ancestral spike nanoparticles developed by Novavax (Keech et al., 2020) is currently undergoing phase 3 testing in the UK, USA, and Mexico, with phase 2 a/b testing ongoing in South Africa. In addition to vaccines, several potent RBD-specific mAbs have received emergency use authorization for treatment of mild-to-moderate COVID-19 in the USA (FDA press release, November 21, 2020 and November 9, 2020), while still other therapeutic mAbs are in development (also see recent announcement) (Tucori et al., 2020).

Here, we show in a lentivirus-based pseudovirus assay that variant B.1.1.7 exhibits only modestly reduced neutralization susceptibility in the presence of convalescent sera (1.5-fold average) and sera from the Moderna and Novavax phase 1 studies (2-fold average after two inoculations) using the prototypic D614G variant as comparator. Our data on the Moderna mRNA vaccine sera are in agreement with a recent study testing B.1.1.7 using sera from a similar mRNA vaccine produced by Pfizer (Muik et al., 2021). While it is not known for certain what level of neutralization is required for the remarkable efficacy in phase 3 studies completed to date, it is noteworthy that both the Moderna and Pfizer/BioNTek mRNA vaccines demonstrated substantial efficacy prior to the second (final) dose (Baden et al., 2020; Polack et al., 2020). Neutralization titers have been shown to increase by approximately 10-fold after the second dose for both vaccines (Anderson et al., 2020; Jackson et al., 2020; Walsh et al., 2020), suggesting that a 2-fold reduction in neutralization will have minimal impact on vaccine efficacy in people who receive both doses of vaccine. The recent finding that the Novavax vaccine was 95.6% effective against the common variant and 85.6% effective against B.1.1.7 (Callaway and Mallapaty, 2021) is consistent with our results. Receiving the

second dose in a timely manner is encouraged for maximum efficacy in regions where the B.1.1.7 variant circulates. In addition, the three RBD mutations N439K, Y453F, and N501Y showed greater impact on neutralization by convalescent sera than by vaccine sera (only Moderna sera were tested against partial variants containing single RBD mutations), suggesting that the mRNA vaccine is more robust in tolerating isolated RBD mutations than natural infections.

In contrast to our findings with polyclonal sera from convalescent individuals and vaccine recipients, the B.1.1.7 variant exhibited markedly reduced susceptibility to a subset of RBD-specific mAbs. Partial escape from four mAbs (COVA1-18, COVA2-15, S309, and to a lesser extent, B38) was associated with the N501Y mutation. Modest escape from two additional mAbs (DH1042 and H4) could not be mapped with the specific mutations tested. Notably, B.1.1.7 exhibited no escape from four RBD-specific mAbs tested here (DH1041, DH1043, DH1047, and P2B-2F6).

In summary, our findings indicate that B.1.1.7 is not a neutralization escape variant of concern for vaccine efficacy and the risk of reinfection. In addition, although the variant is considerably less susceptible to certain mAbs, other RBD-specific mAbs retain full activity. While this is encouraging, it is becoming increasingly clear that SARS-CoV-2 continues to evolve and that new variants may arise that pose a greater risk for immune escape. Early identification and characterization of newly emerging variants requires robust genetic surveillance coupled with rapid laboratory and clinical investigation to facilitate the timely design and testing of next generation vaccines and therapeutic mAbs, should they be needed.

### Limitations of study

Potential drawbacks to our studies include the following. (1) We do not have age and gender information for all samples due to the need for remaining blinded for ongoing work. Nevertheless, we do have age and sex information for the set of Moderna samples used for testing B.1.1.7. We observed comparable level of change in neutralization titers among the age groups and between genders against the variant (Table S1). (2) The neutralization assay we performed utilizes pseudoviruses rather than live viruses. Pseudovirus neutralization assay is deemed a valuable assay for evaluating clinical study samples due to its high throughput, level of formal qualification/validation, ease of incorporating spike variants, and biosafety advantages. Highly significant correlations have been reported between pseudovirus and live virus neutralization assays in evaluating antibody responses against SARS-CoV-2 (Schmidt et al., 2020).

### STAR★METHODS

Detailed methods are provided in the online version of this paper and include the following:

- KEY RESOURCES TABLE
- RESOURCE AVAILABILITY
  - Lead contact
  - Materials availability
  - Data and code availability
- EXPERIMENTAL MODEL AND SUBJECT DETAILS

- Human
- Ethics statement
- **METHOD DETAILS**
  - Serum samples
  - MAbs
  - Cells
  - Pseudotyped virus production
  - Neutralization assay
  - Phylogenetic trees
  - Structural analyses
- **QUANTIFICATION AND STATISTICAL ANALYSIS**

#### SUPPLEMENTAL INFORMATION

Supplemental information can be found online at <https://doi.org/10.1016/j.chom.2021.03.002>.

#### ACKNOWLEDGMENTS

We thank the HIV Vaccine Trials Network and HIV Prevention Trial Network for serum samples from COVID-19 convalescent individuals. We thank Peter Kwong for generously sharing the mAbs B38, H4, P2B-2F6, and S309 produced at the Vaccine Research Center, NIH. We also thank Jin Tong, Elize Domin, Wenhong Feng, and Mirosława Biliska for excellent technical assistance. We thank Francesca Suman for assistance with graphic design. Original data and specimens for Protocol 20-0003 were supported by the Division of Microbiology and Infectious Diseases, National Institute of Allergy and Infectious Diseases. K.W. and B.K. were supported by LANL LDRD 20190441ER. D.C.M., X.S., H.T., and C.M. were supported by the COVID-19 Prevention Network (CoVPN) and the National Institutes of Health. D.L., B.F.H., and K.O.S. were supported by a grant from the State of North Carolina from federal CARES Act funds, and NIAID grant AI142596.

#### AUTHOR CONTRIBUTIONS

D.C.M. designed the study, coordinated assays, data analysis, and manuscript preparation, and helped write and edited the manuscript. X.S. helped with study design, coordinated the study, performed data analysis and visualization, and wrote the manuscript. H.T. participated in study design, site-directed mutagenesis, data generation, and manuscript writing and editing. C.M. participated in data generation and reviewing, and manuscript review and editing. D.L. and K.O.S. produced, purified, and provided mAbs, and edited the manuscript. B.F.H. provided mAbs and edited the manuscript. N.H. contributed data, data visualizations, and to manuscript preparation. B.K. helped with study design, generated data visualizations, and contributed to data interpretation and manuscript preparation. J.T., H.Y., and W.F. also helped generate data visualizations. K.W. provided structural analyses and helped with data interpretation and manuscript preparation.

#### DECLARATION OF INTERESTS

R.P. is an employee of Moderna, Inc. G.S. and G.M.G. are employees of Novavax, Inc.

Received: January 28, 2021  
Revised: February 19, 2021  
Accepted: February 26, 2021  
Published: March 5, 2021

#### REFERENCES

Anderson, E.J., Roupael, N.G., Widge, A.T., Jackson, L.A., Roberts, P.C., Makhene, M., Chappell, J.D., Denison, M.R., Stevens, L.J., Pruijssers, A.J., et al.; mRNA-1273 Study Group (2020). Safety and Immunogenicity of SARS-CoV-2 mRNA-1273 Vaccine in Older Adults. *N. Engl. J. Med.* **383**, 2427–2438.

Baden, L.R., El Sahly, H.M., Essink, B., Kotloff, K., Frey, S., Novak, R., Diemert, D., Spector, S.A., Roupael, N., Creech, C.B., et al. (2020). Efficacy and Safety of the mRNA-1273 SARS-CoV-2 Vaccine. *N. Engl. J. Med.* **384**, 403–416.

Barnes, C.O., Jette, C.A., Abernathy, M.E., Dam, K.A., Esswein, S.R., Gristick, H.B., Malyutin, A.G., Sharaf, N.G., Huey-Tubman, K.E., Lee, Y.E., et al. (2020). SARS-CoV-2 neutralizing antibody structures inform therapeutic strategies. *Nature* **588**, 682–687.

Baum, A., Fulton, B.O., Wloga, E., Copin, R., Pascal, K.E., Russo, V., Giordano, S., Lanza, K., Negron, N., Ni, M., et al. (2020). Antibody cocktail to SARS-CoV-2 spike protein prevents rapid mutational escape seen with individual antibodies. *Science* **369**, 1014–1018.

Biswas, N.K., and Majumder, P.P. (2020). Analysis of RNA sequences of 3636 SARS-CoV-2 collected from 55 countries reveals selective sweep of one virus type. *Indian J. Med. Res.* **151**, 450–458.

Brouwer, P.J.M., Caniels, T.G., van der Straten, K., Snitselaar, J.L., Aldon, Y., Bangaru, S., Torres, J.L., Okba, N.M.A., Claireaux, M., Kerster, G., et al. (2020). Potent neutralizing antibodies from COVID-19 patients define multiple targets of vulnerability. *Science* **369**, 643–650.

Callaway, E., and Mallapaty, S. (2021). Novavax offers first evidence that COVID vaccines protect people against variants. *Nature* **590**, 17, <https://doi.org/10.1038/d41586-021-00268-9>.

Chi, X., Yan, R., Zhang, J., Zhang, G., Zhang, Y., Hao, M., Zhang, Z., Fan, P., Dong, Y., and Yang, Y. (2020). A neutralizing human antibody binds to the N-terminal domain of the Spike protein of SARS-CoV-2. *Science* **369**, 650–655.

Davies, N.G., Barnard, R.C., Jarvis, C.I., Kucharski, A.J., Munday, J., Pearson, C.A.B., Russell, T.W., Tully, D.C., Abbott, S., Gimma, A., et al. (2020). Estimated transmissibility and severity of novel SARS-CoV-2 Variant of Concern 202012/01 in England. medRxiv. <https://doi.org/10.1101/2020.12.24.20248822>.

Galloway, S.E., Paul, P., MacCannell, D.R., Johansson, M.A., Brooks, J.T., MacNeil, A., Slayton, R.B., Tong, S., Silk, B.J., Armstrong, G.L., et al. (2021). Emergence of SARS-CoV-2 B.1.1.7 Lineage - United States, December 29, 2020-January 12, 2021. *MMWR Morb. Mortal. Wkly. Rep.* **70**, 95–99.

Goloboff, P., and Catalano, S. (2016). TNT, version 1.5, with a full implementation of phylogenetic morphometrics. *Cladistics*. <https://doi.org/10.1111/cla.12160>.

Gu, H., Chen, Q., Yang, G., He, L., Fan, H., Deng, Y.Q., Wang, Y., Teng, Y., Zhao, Z., Cui, Y., et al. (2020). Adaptation of SARS-CoV-2 in BALB/c mice for testing vaccine efficacy. *Science* **369**, 1603–1607.

Hansen, J., Baum, A., Pascal, K.E., Russo, V., Giordano, S., Wloga, E., Fulton, B.O., Yan, Y., Koon, K., Patel, K., et al. (2020). Studies in humanized mice and convalescent humans yield a SARS-CoV-2 antibody cocktail. *Science* **369**, 1010–1014.

Hodcroft, E.B., Zuber, M., Nadeau, S., Crawford, K.H.D., Bloom, J.D., Veessler, D., Vaughan, T.G., Comas, I., Candelas, F.G., Stadler, T., et al. (2020). Emergence and spread of a SARS-CoV-2 variant through Europe in the summer of 2020. medRxiv. <https://doi.org/10.1101/2020.10.25.20219063>.

Hou, Y.J., Chiba, S., Halfmann, P., Ehre, C., Kuroda, M., Dinnon, K.H., 3rd, Leist, S.R., Schäfer, A., Nakajima, N., Takahashi, K., et al. (2020). SARS-CoV-2 D614G variant exhibits efficient replication ex vivo and transmission in vivo. *Science* **370**, 1464–1468.

Isabel, S., Graña-Miraglia, L., Gutierrez, J.M., Bundalovic-Torma, C., Groves, H.E., Isabel, M.R., Eshaghi, A., Patel, S.N., Gubbay, J.B., Poutanen, T., et al. (2020). Evolutionary and structural analyses of SARS-CoV-2 D614G spike protein mutation now documented worldwide. *Sci. Rep.* **10**, 14031.

Jackson, L.A., Anderson, E.J., Roupael, N.G., Roberts, P.C., Makhene, M., Coler, R.N., McCullough, M.P., Chappell, J.D., Denison, M.R., Stevens, L.J., et al.; mRNA-1273 Study Group (2020). An mRNA Vaccine against SARS-CoV-2 - Preliminary Report. *N. Engl. J. Med.* **383**, 1920–1931.

Johnson, V.A., and Byington, R.E. (1990). Infectivity assay (virus yield assay). In *Techniques in HIV Research*, A. Aldovani and B.D. Walker, eds. (New York, NY: Stockton Press), pp. 71–76.

- Ju, B., Zhang, Q., Ge, J., Wang, R., Sun, J., Ge, X., Yu, J., Shan, S., Zhou, B., Song, S., et al. (2020). Human neutralizing antibodies elicited by SARS-CoV-2 infection. *Nature* 584, 115–119.
- Keech, C., Albert, G., Cho, I., Robertson, A., Reed, P., Neal, S., Plested, J.S., Zhu, M., Cloney-Clark, S., Zhou, H., et al. (2020). Phase 1-2 Trial of a SARS-CoV-2 Recombinant Spike Protein Nanoparticle Vaccine. *N. Engl. J. Med.* 383, 2320–2332.
- Kemp, S., Datir, R., Collier, D., Ferreira, I., Carabelli, A., Harvey, W., Robertson, D., and Gupta, R. (2020). Recurrent emergence and transmission of a SARS-CoV-2 Spike deletion DH69/V70. *bioRxiv*. <https://doi.org/10.1101/2020.12.14.422555>.
- Korber, B., Fischer, W.M., Gnanakaran, S., Yoon, H., Theiler, J., Abfalterer, W., Hengartner, N., Giorgi, E.E., Bhattacharya, T., Foley, B., et al.; Sheffield COVID-19 Genomics Group (2020). Tracking Changes in SARS-CoV-2 Spike: Evidence that D614G Increases Infectivity of the COVID-19 Virus. *Cell* 182, 812–827.e19.
- Li, D., Edwards, R.J., Manne, K., Martinez, D.R., Schäfer, A., Alam, S.M., Wiehe, K., Lu, X., Parks, R., Sutherland, L.L., et al. (2021). The functions of SARS-CoV-2 neutralizing and infection-enhancing antibodies in vitro and in mice and nonhuman primates. *bioRxiv*. <https://doi.org/10.1101/2020.12.31.424729>.
- Li, Q., Wu, J., Nie, J., Zhang, L., Hao, H., Liu, S., Zhao, C., Zhang, Q., Liu, H., Nie, L., et al. (2020). The Impact of Mutations in SARS-CoV-2 Spike on Viral Infectivity and Antigenicity. *Cell* 182, 1284–1294.e9.
- Muik, A., Wallisch, A.-K., Sängler, B., Swanson, K.A., Mühl, J., Chen, W., Cai, H., Maurus, D., Sarkar, P., Türeci, O., et al. (2021). Neutralization of SARS-CoV-2 lineage B.1.1.7 pseudovirus by BNT162b2 vaccine-elicited human sera. *Science*. <https://doi.org/10.1126/science.abg6105>.
- Naldini, L., Blömer, U., Gallay, P., Ory, D., Mulligan, R., Gage, F.H., Verma, I.M., and Trono, D. (1996). In vivo gene delivery and stable transduction of nondividing cells by a lentiviral vector. *Science* 272, 263–267.
- Naveca, F., Nascimento, V., Souza, V., Corado, A., Nascimento, F., Silva, G., Costa, A., Duarte, D., Pessoa, K., Gonçalves, L., et al. (2021). Phylogenetic relationship of SARS-CoV-2 sequences from Amazonas with emerging Brazilian variants harboring mutations E484K and N501Y in the Spike protein. <https://virological.org/t/phylogenetic-relationship-of-sars-cov-2-sequences-from-amazonas-with-emerging-brazilian-variants-harboring-mutations-e484k-and-n501y-in-the-spike-protein/585>.
- NERVTAG (2021). NERVTAG paper on COVID-19 variant of concern B.1.1.7. <https://www.gov.uk/government/publications/nervtag-paper-on-covid-19-variant-of-concern-b117>.
- Ou, X., Liu, Y., Lei, X., Li, P., Mi, D., Ren, L., Guo, L., Guo, R., Chen, T., Hu, J., et al. (2020). Characterization of spike glycoprotein of SARS-CoV-2 on virus entry and its immune cross-reactivity with SARS-CoV. *Nat. Commun.* 11, 1620.
- Piccoli, L., Park, Y.J., Tortorici, M.A., Czudnochowski, N., Walls, A.C., Beltramello, M., Silacci-Fregni, C., Pinto, D., Rosen, L.E., Bowen, J.E., et al. (2020). Mapping Neutralizing and Immunodominant Sites on the SARS-CoV-2 Spike Receptor-Binding Domain by Structure-Guided High-Resolution Serology. *Cell* 183, 1024–1042.e21.
- Pinto, D., Park, Y.-J., Beltramello, M., Walls, A.C., Tortorici, M.A., Bianchi, S., Jaconi, S., Culap, K., Zatta, F., De Marco, A., et al. (2020). Cross-neutralization of SARS-CoV-2 by a human monoclonal SARS-CoV antibody. *Nature* 583, 290–295.
- Polack, F.P., Thomas, S.J., Kitchin, N., Absalon, J., Gurtman, A., Lockhart, S., Perez, J.L., Pérez Marc, G., Moreira, E.D., Zerbini, C., et al.; C4591001 Clinical Trial Group (2020). Safety and Efficacy of the BNT162b2 mRNA Covid-19 Vaccine. *N. Engl. J. Med.* 383, 2603–2615.
- Zhang, W., Davis, B.D., Chen, S.S., Martinez, J.M.S., Plummer, J.T., and Vail, E. (2021). Emergence of a novel SARS-CoV-2 strain in Southern California, USA. *medRxiv*. <https://doi.org/10.1101/2021.01.18.21249786>.
- Public Health England (2020). Public Health England: Investigation of novel SARS-CoV-2 variant Variant of Concern 202012/01, P.H. England, ed. (Technical briefing 2: December 28, 2020). [https://assets.publishing.service.gov.uk/government/uploads/system/uploads/attachment\\_data/file/959361/Technical\\_Briefing\\_VOC202012-2\\_Briefing\\_2.pdf](https://assets.publishing.service.gov.uk/government/uploads/system/uploads/attachment_data/file/959361/Technical_Briefing_VOC202012-2_Briefing_2.pdf).
- Public Health England (2021). Investigation of novel SARS-CoV-2 variant Variant of Concern 202012/01 (Technical briefing 3: January 8, 2021). P.H. England, ed. [https://assets.publishing.service.gov.uk/government/uploads/system/uploads/attachment\\_data/file/959360/Variant\\_of\\_Concern\\_VOC\\_202012\\_01\\_Technical\\_Briefing\\_3.pdf](https://assets.publishing.service.gov.uk/government/uploads/system/uploads/attachment_data/file/959360/Variant_of_Concern_VOC_202012_01_Technical_Briefing_3.pdf)
- Rambaut, A., Loman, N., Pybus, O., Barclay, W., Barrett, J., Carabelli, A., Connor, T., Peacock, T., Robertson, D.L., Volz, E., et al. (2020). Preliminary genomic characterisation of an emergent SARS-CoV-2 lineage in the UK defined by a novel set of spike mutations. <https://virological.org/t/preliminary-genomic-characterisation-of-an-emergent-sars-cov-2-lineage-in-the-uk-defined-by-a-novel-set-of-spike-mutations/563>.
- Santos, J.C., and Passos, G.A. (2021). The high infectivity of SARS-CoV-2 B.1.1.7 is associated with increased interaction force between Spike-ACE2 caused by the viral N501Y mutation. *bioRxiv*. <https://doi.org/10.1101/2020.12.29.424708>.
- Schmidt, F., Weisblum, Y., Muecksch, F., Hoffmann, H.H., Michailidis, E., Giandhari, J., Doolabh, D., Pillay, S., San, E.J., Msomi, N., et al. (2020). Measuring SARS-CoV-2 neutralizing antibody activity using pseudotyped and chimeric viruses. *J. Exp. Med.* 217, <https://doi.org/10.1084/jem.20201181>.
- Storey, J.D., and Tibshirani, R. (2003). Statistical significance for genomewide studies. *Proc. Natl. Acad. Sci. USA* 100, 9440–9445.
- Tegally, H., Wilkinson, E., Giovanetti, M., Iranzadeh, A., Fonseca, V., Giandhari, J., Doolabh, D., Pillay, S., San, E.J., Msomi, N., et al. (2020). Emergence and rapid spread of a new severe acute respiratory syndrome-related coronavirus 2 (SARS-CoV-2) lineage with multiple spike mutations in South Africa. *medRxiv*. <https://doi.org/10.1101/2020.12.21.20248640>.
- Thomson, E.C., Rosen, L.E., Shepherd, J.G., Spreafico, R., da Silva Filipe, A., Wojcechowskyj, J.A., Davis, C., Piccoli, L., Pascall, D.J., Dillen, J., et al. (2020). The circulating SARS-CoV-2 spike variant N439K maintains fitness while evading antibody-mediated immunity. *bioRxiv*. <https://doi.org/10.1101/2020.11.04.355842>.
- Tuccori, M., Ferraro, S., Convertino, I., Cappello, E., Valdiserra, G., Blandizzi, C., Maggi, F., and Focosi, D. (2020). Anti-SARS-CoV-2 neutralizing monoclonal antibodies: clinical pipeline. *MAbs* 12, 1854149.
- van Dorp, L., Tan, C.C., Lam, S.D., Richard, D., Owen, C., Berchtold, D., Orengo, C., and Balloux, F. (2020). Recurrent mutations in SARS-CoV-2 genomes isolated from mink point to rapid host-adaptation. *bioRxiv*. <https://doi.org/10.1101/2020.11.16.384743>.
- Varabyou, A., Pockrandt, C., Salzberg, S.L., and Pertea, M. (2020). Rapid detection of inter-clade recombination in SARS-CoV-2 with Bolotie. *bioRxiv*. <https://doi.org/10.1101/2020.09.21.300913>.
- Volz, E., Mishra, S., Chand, M., Barrett, J.C., Johnson, R., Geidelberg, L., Hinsley, W.R., Laydon, D.J., Dabrera, G., O’Toole, Á., et al. (2021). Transmission of SARS-CoV-2 Lineage B.1.1.7 in England: Insights from linking epidemiological and genetic data. *medRxiv*. <https://doi.org/10.1101/2020.12.30.20249034>.
- Voysey, M., Clemens, S.A.C., Madhi, S.A., Weckx, L.Y., Folegatti, P.M., Aley, P.K., Angus, B., Baillie, V.L., Barnabas, S.L., Bhorat, Q.E., et al.; Oxford COVID Vaccine Trial Group (2021). Safety and efficacy of the ChAdOx1 nCoV-19 vaccine (AZD1222) against SARS-CoV-2: an interim analysis of four randomised controlled trials in Brazil, South Africa, and the UK. *Lancet* 397, 99–111.
- Wagh, K., Hahn, B.H., and Korber, B. (2020). Hitting the sweet spot: exploiting HIV-1 glycan shield for induction of broadly neutralizing antibodies. *Curr. Opin. HIV AIDS* 15, 267–274.
- Walsh, E.E., Frenck, R.W., Jr., Falsey, A.R., Kitchin, N., Absalon, J., Gurtman, A., Lockhart, S., Neuzil, K., Mulligan, M.J., Bailey, R., et al. (2020). Safety and Immunogenicity of Two RNA-Based Covid-19 Vaccine Candidates. *N. Engl. J. Med.* 383, 2439–2450.
- Wang, P., Lihong, L., Iketani, S., Luo, Y., Guo, Y., Wang, M., Yu, J., Zhang, B., Kwang, P.D., Graham, B.S., et al. (2021). Increased Resistance of SARS-CoV-2 Variants B.1.351 and B.1.1.7 to Antibody Neutralization. *bioRxiv*. <https://doi.org/10.1101/2021.01.25.428137>.

Weinreich, D.M., Sivapalasingam, S., Norton, T., Ali, S., Gao, H., Bhore, R., Musser, B.J., Soo, Y., Rofail, D., Im, J., et al.; Trial Investigators (2021). REGN-COV2, a Neutralizing Antibody Cocktail, in Outpatients with Covid-19. *N. Engl. J. Med.* *384*, 238–251.

Weissman, D., Alameh, M.-G., de Silva, T., Collini, P., Hornsby, H., Brown, R., LaBranche, C.C., Edwards, R.J., Sutherland, L., Santra, S., et al. (2021). D614G Spike Mutation Increases SARS CoV-2 Susceptibility to Neutralization. *Cell Host Microbe* *29*, 23–31.e4.

Wibmer, C.K., Ayres, F., Hermanus, T., Madzivhandila, M., Kgagudi, P., Lambson, B.E., Vermeulen, M., van den Berg, K., Rossouw, T., Boswell, M., et al. (2021). SARS-CoV-2 501Y.V2 escapes neutralization by South African COVID-19 donor plasma. *bioRxiv*. <https://doi.org/10.1101/2021.01.18.427166>.

Wu, Y., Wang, F., Shen, C., Peng, W., Li, D., Zhao, C., Li, Z., Li, S., Bi, Y., Yang, Y., et al. (2020). A noncompeting pair of human neutralizing antibodies block COVID-19 virus binding to its receptor ACE2. *Science* *368*, 1274–1278.

Wu, K., Werner, A.P., Moliva, J.I., Koch, M., Choi, A., Stewart-Jones, G.B.E., Bennett, H., Boyoglu-Barnum, S., Shi, W., Graham, B.S., et al. (2021). mRNA-1273 vaccine induces neutralizing antibodies against spike mutants from global SARS-CoV-2 variants. *bioRxiv*. <https://doi.org/10.1101/2021.01.25.427948>.

Yurkovetskiy, L., Wang, X., Pascal, K.E., Tomkins-Tinch, C., Nyalile, T.P., Wang, Y., Baum, A., Diehl, W.E., Dauphin, A., Carbone, C., et al. (2020). Structural and Functional Analysis of the D614G SARS-CoV-2 Spike Protein Variant. *Cell* *183*, 739–751.e8.

## STAR★METHODS

## KEY RESOURCES TABLE

| REAGENT or RESOURCE                                                                                 | SOURCE                                     | IDENTIFIER                                                                                                    |
|-----------------------------------------------------------------------------------------------------|--------------------------------------------|---------------------------------------------------------------------------------------------------------------|
| <b>Antibodies</b>                                                                                   |                                            |                                                                                                               |
| DH1041, DH1042, DH1043, and DH1047                                                                  | Kevin Saunders & Barton Haynes, Duke       | <a href="#">Li et al., 2021</a>                                                                               |
| B38 and H4                                                                                          | Peter Kwong, VRC/NIH                       | <a href="#">Wu et al., 2020</a>                                                                               |
| P2B-2F6                                                                                             | Peter Kwong, VRC/NIH                       | <a href="#">Ju et al., 2020</a>                                                                               |
| S309                                                                                                | Peter Kwong, VRC/NIH                       | <a href="#">Pinto et al., 2020</a>                                                                            |
| <b>Critical commercial assays</b>                                                                   |                                            |                                                                                                               |
| Luciferase Cell Culture Lysis 5x Reagent                                                            | Promega                                    | Cat# E1531                                                                                                    |
| Bright-Glo Luciferase Assay System                                                                  | Promega                                    | Cat# #2650                                                                                                    |
| <b>Deposited data</b>                                                                               |                                            |                                                                                                               |
| <a href="#">Tables S1, S2, and S3</a>                                                               | This paper                                 | <a href="https://data.mendeley.com/datasets/ty33r9g972/1">https://data.mendeley.com/datasets/ty33r9g972/1</a> |
| Additional dilution data                                                                            | This paper                                 | <a href="https://data.mendeley.com/datasets/stwvcrkswf/1">https://data.mendeley.com/datasets/stwvcrkswf/1</a> |
| <b>Experimental models: Cell lines</b>                                                              |                                            |                                                                                                               |
| 293T/ACE2 cells                                                                                     | Drs. Mike Farzan and Huihui Mu at Scripps  | 293T/ACE2 cells                                                                                               |
| HEK293T/17                                                                                          | ATCC                                       | CRL-11268                                                                                                     |
| <b>Oligonucleotides</b>                                                                             |                                            |                                                                                                               |
| Primers for site-direct mutagenesis, see <a href="#">Table S3</a> .                                 | This paper                                 | N/A                                                                                                           |
| <b>Software and algorithms</b>                                                                      |                                            |                                                                                                               |
| R (Version 3.6.1)                                                                                   | The R Foundation for Statistical Computing | <a href="http://www.r-project.org/">http://www.r-project.org/</a>                                             |
| R packages: tidyverse (Version 1.2.1); dplyr (Version 0.8.5); ggplot2 (Version 3.3.0); coin (1.3-1) | The R Foundation for Statistical Computing | <a href="https://cran.r-project.org/">https://cran.r-project.org/</a>                                         |
| Python (Version 3.4.2) package                                                                      | Python                                     | <a href="https://github.com/nfusi/qvalue">https://github.com/nfusi/qvalue</a>                                 |
| PyMOL (Version 2.0)                                                                                 | PyMOL Molecular Graphics System            | <a href="#">Pymol.org</a>                                                                                     |
| Sequencher (Version 5.4.6)                                                                          | Gene Codes Corporation                     | <a href="http://www.Genecodes.com">www.Genecodes.com</a>                                                      |
| SnapGene (Version 5.2.4)                                                                            | GSL Biotech LLC                            | <a href="http://www.snapgene.com">www.snapgene.com</a>                                                        |

## RESOURCE AVAILABILITY

## Lead contact

Further information and requests for supporting data, resources, and reagents should be directed to and will be fulfilled upon request by the Lead Contact: David Montefiori ([monte@duke.edu](mailto:monte@duke.edu)).

## Materials availability

Reagents from this study are available upon request.

## Data and code availability

Neutralization dilution data have been deposited to Mendeley Data: <https://data.mendeley.com/datasets/stwvcrkswf/1>.

## EXPERIMENTAL MODEL AND SUBJECT DETAILS

## Human

Moderna phase 1 study (NCT04283461) is a phase I, open-label, dose-ranging clinical trial in healthy males and non-pregnant females, starting at 18 years of age testing the mRNA-1273 vaccine. mRNA-1273 is a lipid nanoparticle (LNP)-encapsulated mRNA-based vaccine that encodes for a full-length, prefusion stabilized spike (S) protein of SARS-CoV-2. Trial subjects received 2 vaccine immunization on day 1 and day 29 of the study.

Novavax phase 1 study (NCT04368988) is a 2-part, randomized, observer-blinded, placebo-controlled, Phase 1/2 trial. The study tested a SARS-CoV-2 recombinant nanoparticle vaccine with or without Matrix-M adjuvant (Keech et al., 2020) in health volunteered age between 18 and 84 years.

HVTN 405/HPTN 1901 is an observational cohort study HVTN 405/HPTN 1901 (NCT04403880). Participants were followed starting at 1-8 weeks post resolution of COVID-19 or 2-10 weeks post most recent positive SARS-CoV-2 test, if asymptomatic, and then 2 months, 4 months, and 1 year later (optional).

### Ethics statement

Clinical trials described in this manuscript were approved by the appropriate Institutional Review Boards (IRBs). Informed consent was obtained from all subjects in the trials.

### METHOD DETAILS

#### Serum samples

Sera for the mRNA-1273 phase 1 study (NCT04283461) were obtained from the Division of Microbiology and Infectious Diseases, National Institute of Allergy and Infectious Diseases for the mRNA-1273 phase 1 study team and Moderna Inc. The phase 1 study protocols and results are reported previously (Anderson et al., 2020; Jackson et al., 2020). The phase 1 trial tested the identical vaccine (mRNA-1273), dose (100  $\mu$ g) and schedule as used in the Moderna phase 3 (NCT04470427). mRNA-1273 is a lipid nanoparticle (LNP)-encapsulated mRNA-based vaccine that encodes for a full-length, prefusion stabilized spike protein of SARS-CoV-2 (Baden et al., 2020). Samples tested against the B.1.1.7 variant (together with D614G as control) were collected at day 29 (4 weeks post 1<sup>st</sup> inoculation) or day 57 (4 weeks post 2<sup>nd</sup> inoculation). Samples tested against the subvariants (together with D614G as control) were all from day 57.

Novavax phase 1 sera were obtained from Novavax. The phase 1 study (NCT04368988) tested a 5  $\mu$ g dose of SARS-CoV-2 recombinant nanoparticle vaccine with or without 50  $\mu$ g of Matrix-M adjuvant (Keech et al., 2020). Serum samples (N = 28) tested here were from the vaccine arm with the Maxtrix-M adjuvant, which is the identical vaccine in the ongoing Novavax global phase 3 study (NC04611802). Samples tested represent the entire Phase 1 vaccine cohort and were not pre-selected for higher titer responses at 2 weeks post 2<sup>nd</sup> inoculation (day 35).

Convalescent sera were collected in an observational cohort study conducted by the HIV Vaccine Trial Network and the HIV Prevention Trials Network (protocol HVTN 405/HPTN 1901; NCT04403880). Samples were collected from the first visit of the study, scheduled at 1-8 weeks post resolution of COVID-19, or 2-10 weeks post most recent positive SARS-CoV-2 test, if asymptomatic. The subset of samples included in this study were pre-selected as representing high, medium and low neutralization titers against the D614G variant of SARS-CoV-2.

#### MAbs

Antibodies B38, H4, P2B-2F6, and S309 (Ju et al., 2020; Pinto et al., 2020; Wu et al., 2020), were provided by Dr. Peter Kwong. Antibodies DH1041, DH1042, DH1043, and DH1047 were provided by Drs. Kevin Saunders, Dapeng Li, and Barton Haynes (Li et al., 2021). Antibodies COVA1-18 and COVA2-15 were provided by Dr. Rogier Sanders (Brouwer et al., 2020).

#### Cells

HEK293T/17 cells (ATCC cat. no. CRL-11268) and 293T/ACE2.MF (provided by Drs. Michael Farzan and Huihui Mu) were maintained in 12 mL of growth medium (DMEM, 10% heat-inactivated fetal bovine serum, 50  $\mu$ g gentamicin/mL, 25mM HEPES) in T-75 culture flasks in a humidified 37°C, 5% CO<sub>2</sub> environment. Puromycin (3  $\mu$ g/mL) was added to the growth medium for maintaining 293T/ACE2.MF cells. Cells were split at confluency using TrypLE Select Enzyme solution (Thermo Fisher Scientific).

#### Pseudotyped virus production

SARS-CoV-2 spike-pseudotyped viruses were prepared and titrated for infectivity essentially as described previously (Korber et al., 2020). An expression plasmid encoding codon-optimized full-length spike of the Wuhan-1 strain (VRC7480), was provided by Drs. Barney Graham and Kizzmekia Corbett at the Vaccine Research Center, National Institutes of Health (USA). Mutations were introduced into VRC7480 by site-directed mutagenesis (Weissman et al., 2021) using the QuikChange Lightning Site-Directed Mutagenesis Kit from Agilent Technologies (Catalog # 210518) using primers as listed in Table S3. All mutations were confirmed by full-length spike gene sequencing by Sanger Sequencing, using Sequencher and SnapGene for sequence analyses. Pseudovirions were produced in HEK293T/17 cells (ATCC cat. no. CRL-11268) by transfection using Fugene 6 (Promega Cat#E2692) and a combination of spike plasmid, lentiviral backbone plasmid (pCMV  $\Delta$ R8.2) and firefly Luc reporter gene plasmid (pHR' CMV Luc) (Naldini et al., 1996) in a 1:17:17 ratio in Opti-MEM (Life Technologies). Transfection mixtures were added to pre-seeded HEK293T/17 cells in T-75 flasks containing 12 mL of growth medium and incubated for 16-20 h at 37°C. Medium was removed and 15 mL of fresh growth medium added. Pseudovirus-containing culture medium was collected after an additional 2 days of incubation and clarified of cells by low-speed centrifugation and 0.45  $\mu$ m micron filtration.

TCID50 assays were performed prior to freezing aliquots of the viruses at -80°C. Viruses were serially diluted 3-fold or 5-fold in quadruplicate for a total of 11 dilutions in 96-well flat-bottom poly-L-lysine-coated culture plates (Corning Biocoat). An additional

4 wells served as background controls; these wells received cells but no virus. Freshly suspended 293T/ACE2.MF cells were added (10,000 cells/well) and incubated for 66–72 h. Medium was removed by gentle aspiration and 30  $\mu$ l of Promega 1X lysis buffer was added to all wells. After a 10 min incubation at room temperature, 100  $\mu$ l of Bright-Glo luciferase reagent was added to all wells, mixed, and 105  $\mu$ l of the mixture was added to a black/white plate (Perkin-Elmer). Luminescence was measured using a GloMax Navigator luminometer (Promega). TCID<sub>50</sub> was calculated using the method of Reed and Muench as described (Johnson and Byington, 1990).

### Neutralization assay

Neutralization was measured in a formally validated assay that utilized lentiviral particles pseudotyped with SARS-CoV-2 spike and containing a firefly luciferase (Luc) reporter gene for quantitative measurements of infection by relative luminescence units (RLU). A pre-titrated dose of virus was incubated with 8 serial 5-fold dilutions of serum samples in duplicate in a total volume of 150  $\mu$ l for 1 h at 37°C in 96-well flat-bottom poly-L-lysine-coated culture plates. Cells were detached using TrypLE Select Enzyme solution, suspended in growth medium (100,000 cells/mL) and immediately added to all wells (10,000 cells in 100  $\mu$ L of growth medium per well). One set of 8 wells received cells + virus (virus control) and another set of 8 wells received cells only (background control). After 66–72 h of incubation, medium was removed by gentle aspiration and 30  $\mu$ l of Promega 1X lysis buffer was added to all wells. After a 10 min incubation at room temperature, 100  $\mu$ l of Bright-Glo luciferase reagent was added to all wells. After 1–2 min, 110  $\mu$ l of the cell lysate was transferred to a black/white plate. Luminescence was measured using a GloMax Navigator luminometer (Promega). Neutralization titers are the inhibitory dilution (ID) of serum samples, or the inhibitory concentration (IC) of mAbs at which RLU<sub>s</sub> were reduced by either 50% (ID<sub>50</sub>/IC<sub>50</sub>) or 80% (ID<sub>80</sub>/IC<sub>80</sub>) compared to virus control wells after subtraction of background RLU<sub>s</sub>. Serum samples were heat-inactivated for 30 min at 56°C prior to assay. This pseudotyped neutralization assay has been formally validated and reviewed by FDA for evaluation of phase 3 clinical trial samples. In addition, all assays were performed in compliance with GCLP guidelines.

### Phylogenetic trees

The tree in Figure S1 is based on the GISAID data sampled on Jan. 17th, 2021, and passed through a quality control filter, and presented as the “tree of the day” at the [cov.lanl.gov](https://cov.lanl.gov) website <https://cov.lanl.gov/components/sequence/COV/rainbow.comp>. The “full” alignment was used as described previously (Korber et al., 2020). Only the mutations of interest for this study are tracked in this tree for clarity. The tree is rooted using the Wuhan-Hu-1 isolate (GenBank accession NC\_045512).

All Phylogenetic trees are constructed using parsimony, TNT version 1.5 (Goloboff and Catalano, 2016), with 5 or 10 random-sequence addition replicates with TBR (tree-bisection-reconnection) branch swapping (command: “mult = rep REPS tbr hold 1 wclu 1000,” where REPS equals 5 or 10, with the bbreak cluster value set to 40).

### Structural analyses

We used PDB: 7C2L (Chi et al., 2020) for the full trimeric spike structure, and antibody spike complex structures from Li et al. (Li et al., 2021) for DH1041–DH1047 antibodies, PDB: 6WPS (Pinto et al., 2020) for S309, PDB: 7BWJ (Ju et al., 2020) for P2B–2F6, and PDB: 6XDG for REGN antibodies (Hansen et al., 2020). Antibody epitopes were defined as spike amino acids with any heavy atoms within 4 Å antibody heavy atoms (Barnes et al., 2020). Antibody epitope, electrostatics and polar bonds calculations as well as mutation modeling were performed in PyMOL (The PyMOL Molecular Graphics System, Version 2.0 Schrödinger, LLC.). Mutations were modeled with spike or RBD in isolation and the rotamers with least predicted strain in PyMOL were used. For B38, to identify the most amenable Y-501 rotamers, the N501Y mutation was modeled with the antibody–RBD complex; however, all identified rotamers induced substantial clashes and the rotamer with the least clash was retained. PyMOL was also used for structural renderings for all figures.

### QUANTIFICATION AND STATISTICAL ANALYSIS

Neutralization ID<sub>50</sub> titers or IC<sub>50</sub> concentrations between each variant and D614G, or between other pairs of variants with and without the N501Y or  $\Delta$ H69–V70 were compared using the Wilcoxon signed-rank 2-tailed test. Decrease in ID<sub>50</sub> and ID<sub>80</sub> titer for Moderna Day 29 and Day 57 samples against B.1.1.7 were compared using the Wilcoxon rank-sum test, 2-tailed. To correct for multiple test corrections, false discovery rates (FDR or q values) were calculated as in (Storey and Tibshirani, 2003) implemented in a Python package (<https://github.com/nfusi/qvalue>) for Python version 3.4.2. All tests with  $q < 0.1$  were considered as significant, which corresponded to  $p < 0.042$ . Wilcoxon signed-rank test and Wilcoxon rank-sum test were performed using the coin package (version 1.3-1) with R (version 3.6.1). Wilcoxon signed-rank test and Wilcoxon rank-sum test were performed using the coin package (version 1.3-1) with R (version 3.6.1).

**Cell Host & Microbe, Volume 29**

**Supplemental information**

**SARS-CoV-2 variant B.1.1.7 is susceptible  
to neutralizing antibodies  
elicited by ancestral spike vaccines**

**Xiaoying Shen, Haili Tang, Charlene McDanal, Kshitij Wagh, William Fischer, James Theiler, Hyejin Yoon, Dapeng Li, Barton F. Haynes, Kevin O. Sanders, Sandrasegaram Gnanakaran, Nick Hengartner, Rolando Pajon, Gale Smith, Gregory M. Glenn, Bette Korber, and David C. Montefiori**



## **Contents of Supplemental Information**

### **Supplementary figures:**

Figure S1. Parsimony tree showing the relationships between B.1.1.7 and other variants with key mutations, related to Figure 1.

Figure S2. Highlighter plot showing the mutations associated with major clade in the UK and Denmark transitioning over time, related to Figure 1.

Figure S3. Transitions in key mutational patterns over time in local regions in Denmark and in England, related to Figure 1.

### **Supplementary figure legends.**

### **Supplementary tables:**

Table S1. Serum neutralization titers and fold difference (D614G/Variant), related to Figure 2.

Table S2. Statistical results, related to Figure 2.

Table S3. Primers used for site-directed-mutagenesis, related to STAR Methods.

Figure S1

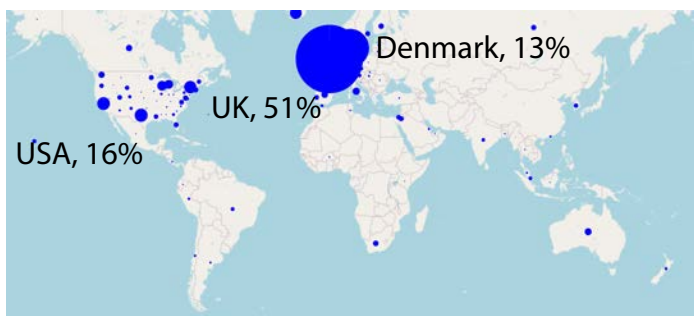

Global Sampling, Jun. 1, 2020 -Jan. 15, 2021

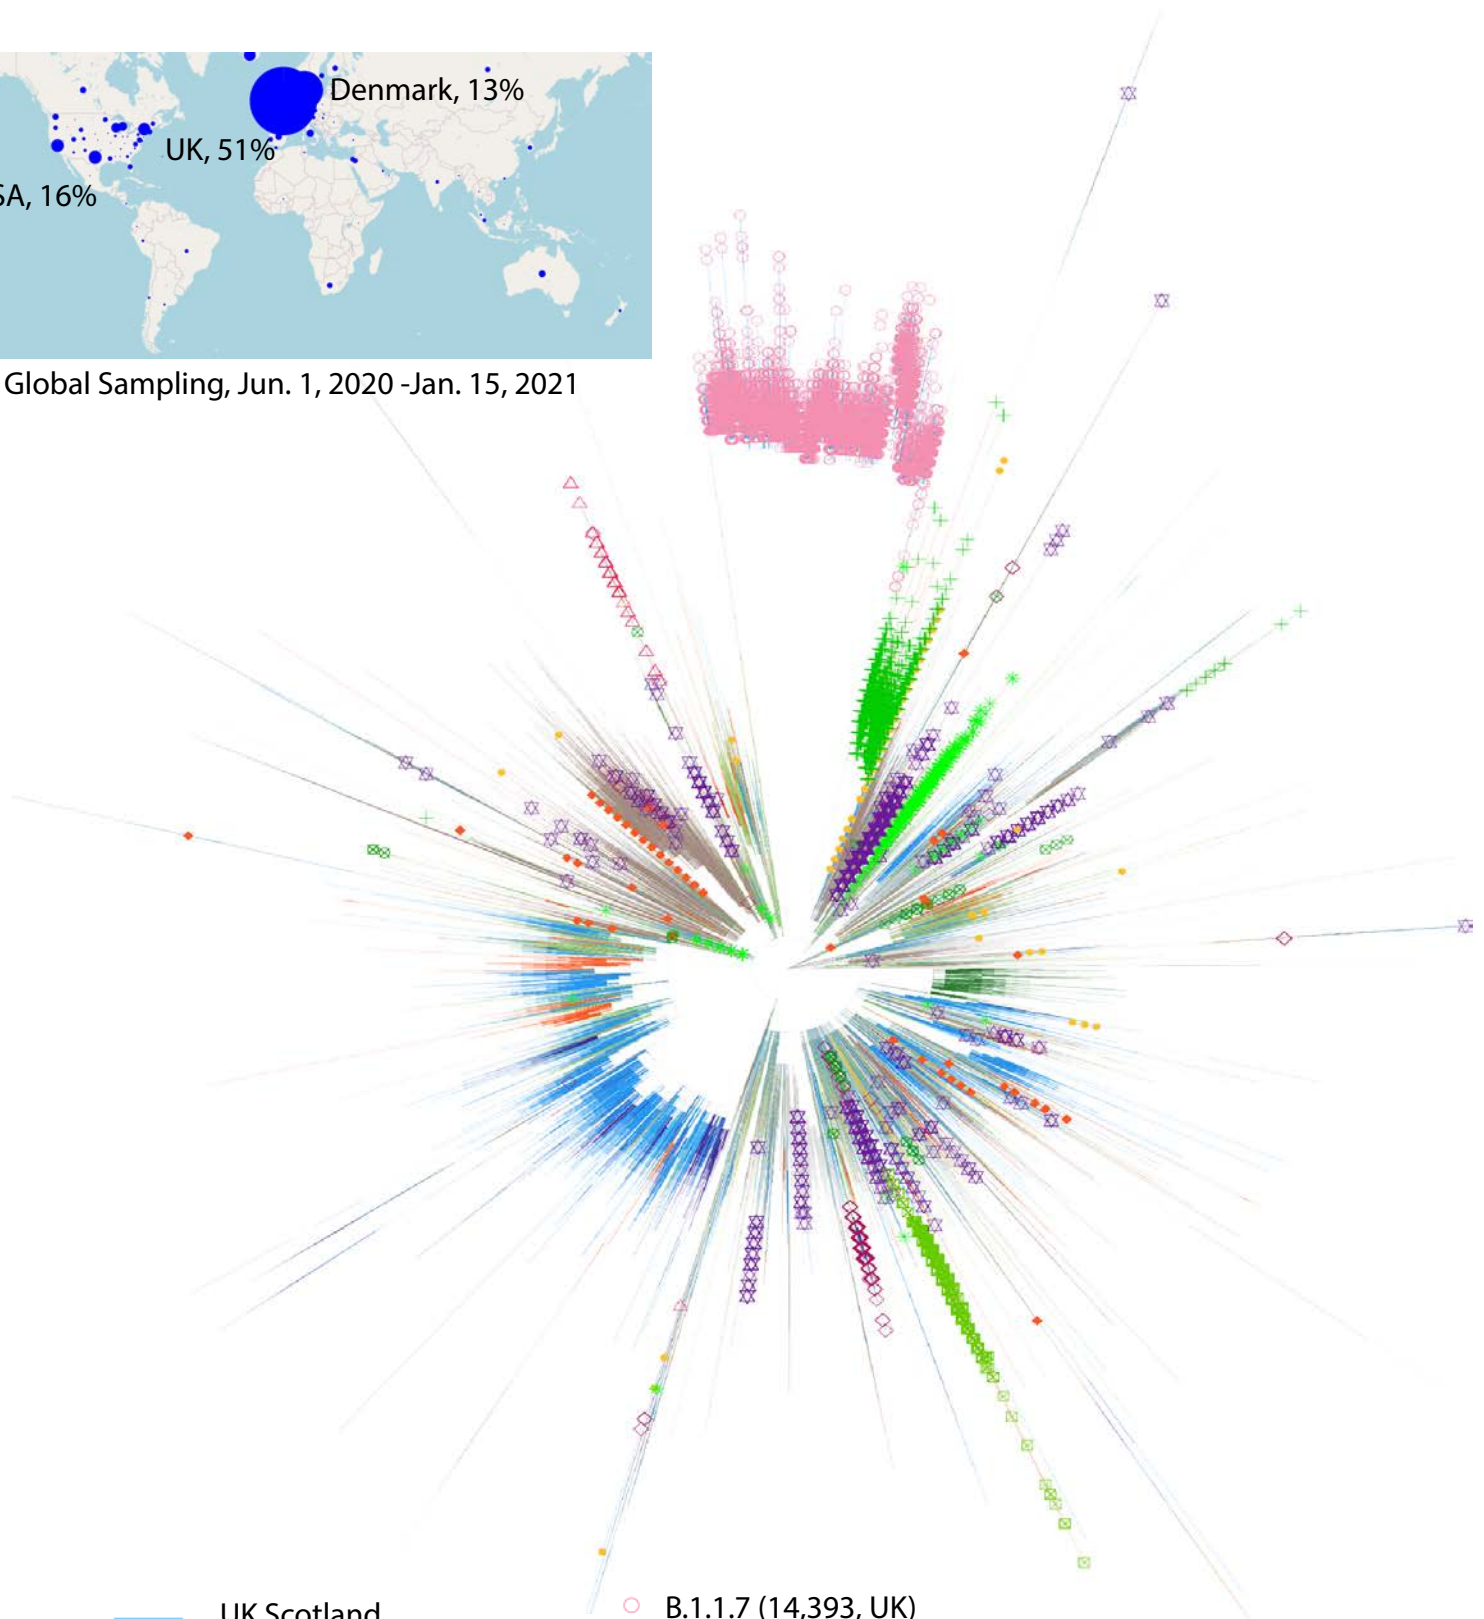

- UK Scotland
- UK England
- UK Ireland
- UK Wales
- Europe, not Denmark
- Australia
- South Africa
- Denmark
- USA

- B.1.1.7 (14,393, UK)
- △ 501Y.V2 (71, S. Africa)
- ◇ N501Y (439, Wales)
- ◆ N501T (233, Australia)
- del69/70 (200, US, UK)
- + del69/70 + N439K (4,319, Denmark, UK)
- \* N439K (1,253, Denmark, UK)
- ⊠ del69/70 + Y453F (791, Denmark, UK)
- ⊞ Y453F (150, Denmark, UK)
- ⊗ P681H (1552, US (Hawaii))

Figure S2

Genome position, reference strain NC\_045512

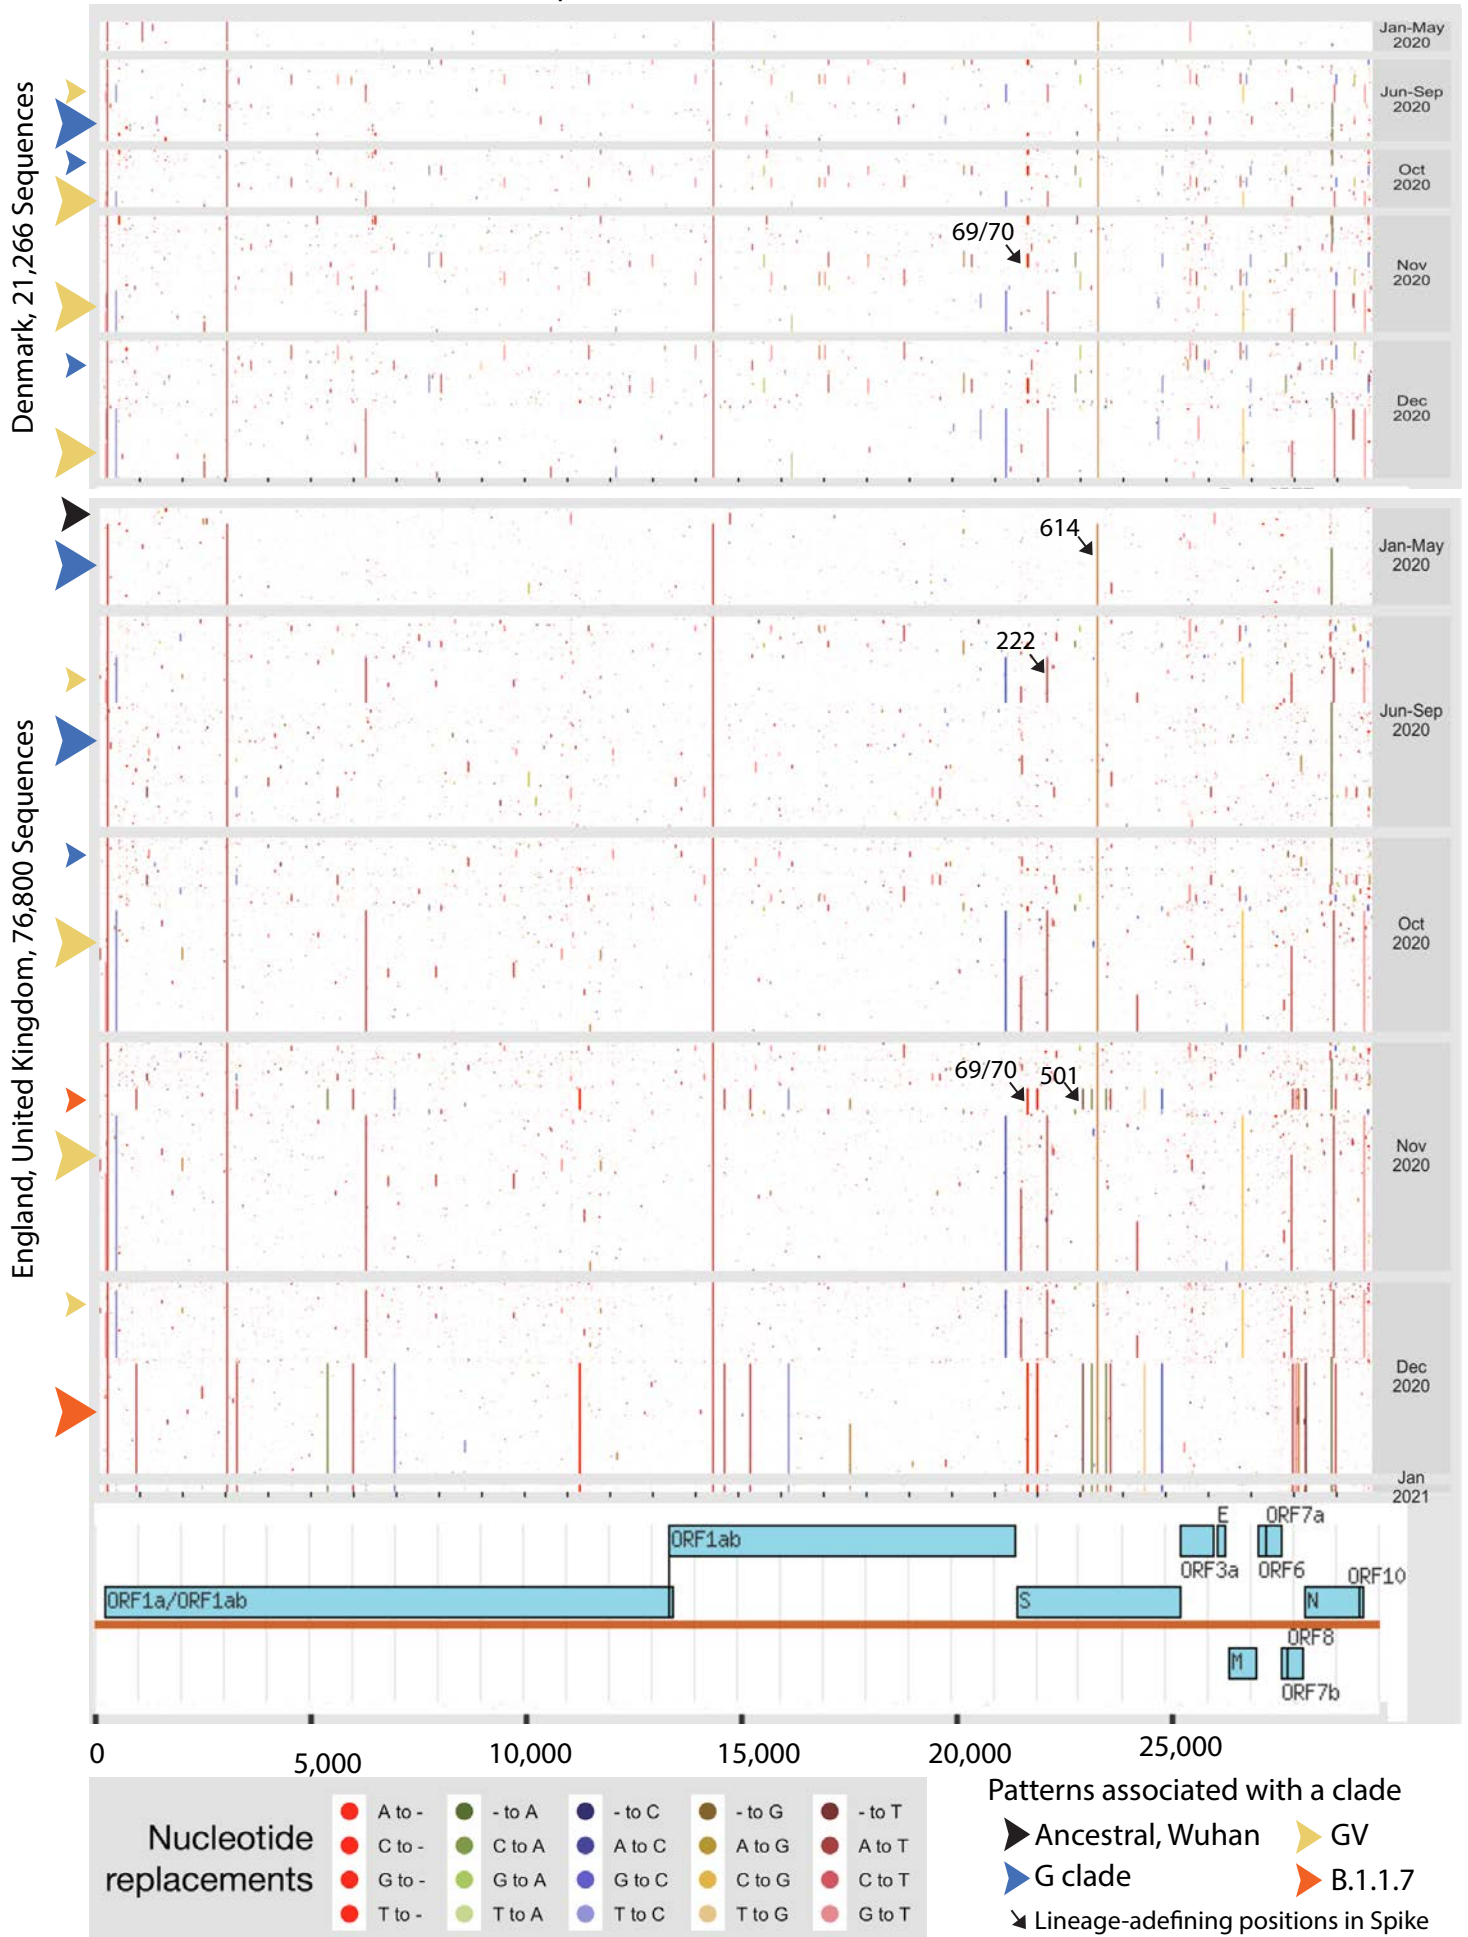

**Figure S3**

**A. Spike transitions within the UK: weekly running averages**

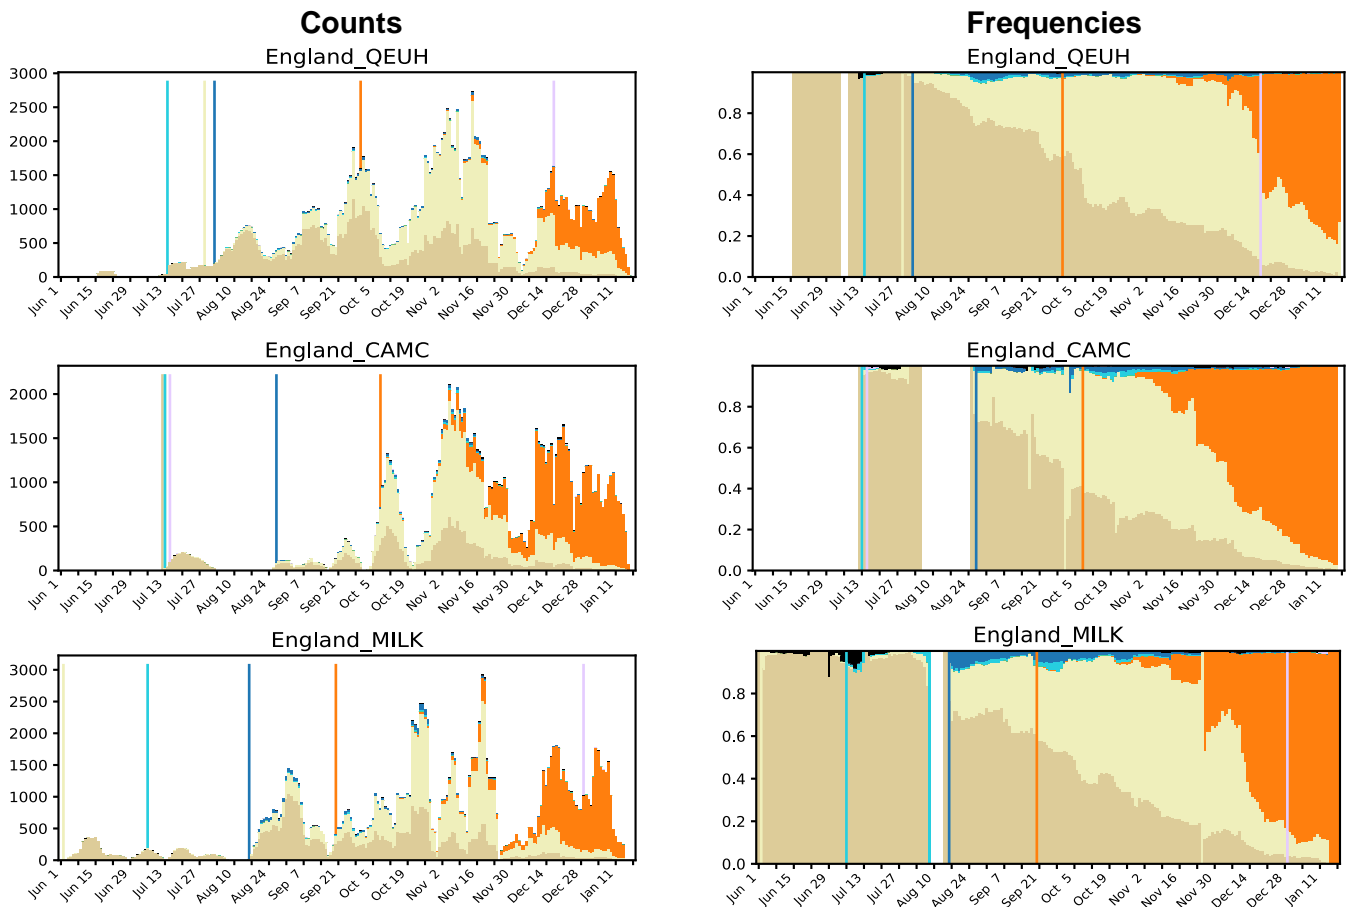

**B. Spike transitions within Denmark: weekly running averages**

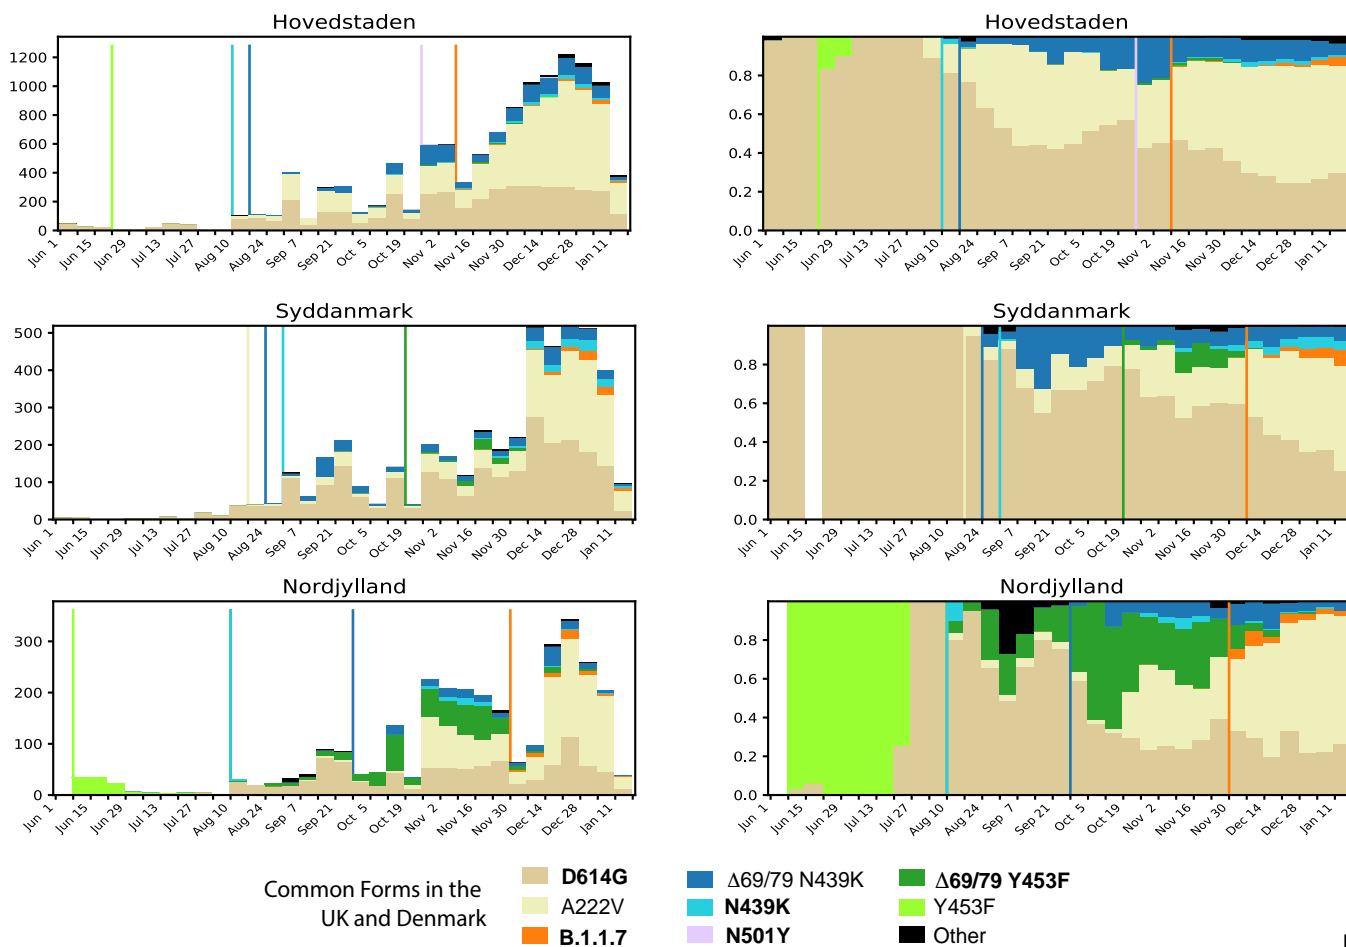

Fig. S3

**Fig. S1. Parsimony tree showing the relationships between B.1.1.7 and other variants with key mutations.** 244,291 sequences were included in this tree, which is based on the GISAID data sampled on Jan. 17th, 2021. Countries where the variants of interest are commonly found are indicated by branch color, key variants by symbols at the tips. The B.1.1.7 lineage is shown as pink open circles. The B.1.1.7 variant is still predominantly found in the UK, but by Jan. 24<sup>th</sup> 2021 had been sampled in 44 countries, and in 20 different states in the USA. Some of these geographically diverse samples were likely to have been detected as a consequence of sampling travelers from the UK and their contacts, due to the international interest in B.1.1.7 in late Dec. 2020 and early Jan. 2021; regardless of this potential sampling bias, the B.1.1.7 variant clearly has a global presence. The N501Y mutation is also found in the South African Variant of Interest, 501Y.V2, the red open triangles. N501Y has also transiently but significantly emerged in local populations, as a lone Spike mutation on the D614G background, found in the early summer in Victoria, Australia, and also found in Wales (in this figure, and followed over time in Fig. 1). A distinct variant, N501T, has been emerging in Sydney, New South Wales, Australia, that has become increasingly common through December, 2020. Variants carrying the only the deletion in Spike at  $\Delta 69/70$  on a D614G background; on the rare occasions they are found, they were primarily sampled in the UK and US. In contrast,  $\Delta 69/70$  is frequently found coupled with other RBM mutations, either embedded in B.1.1.7 or coupled with N439K or Y453F, commonly circulating in both Denmark and UK as well as in other European countries; N439K and Y453F variants not coupled to  $\Delta 69/70$  are found less frequently (see Fig. 1B). Of note, P681H is embedded in B.1.1.7, but is also frequently found independently, and is often found to increase in frequency regionally when it does arise, and it is recurrent throughout the phylogeny; it is the dominant form in the Hawaiian epidemic, and is found in many places throughout the US. All of the currently variants of interest are in the G clade, Spike D614G background. The map insert includes the subset of complete GISAID sequences with a known sampling date that were sampled since June 1, 2020, and the area of the circle is proportional to sample size, illustrating the strong sampling bias in the data: the UK is contributing over half of the sequences in the dataset, with the USA and Denmark following, these three nations account for 80% of the GISAID sequences that pass through the cov.lanl.gov quality control screen.

**Fig. S2. Highlighter plot showing the mutations associated with major clade in the UK and Denmark transitioning over time.** Distribution of mutations among SARS-CoV-2 sequences from Denmark and from England, UK. These figures are highly compressed pixel plots representing the full sampling of complete sequences from these countries, nearly 100,000 sequences in all, and full length genomes across the x-axis. Each row in the matrix represents a single genome sequence; each column, a genome position. Colored dots denote locations of nucleotide mutations relative to the Wuhan-Hu-1 isolate (GenBank accession NC\_045512); unmutated bases are white to allow visualization of mutations. Sequences are presented in separate panels based on time of sampling. Within each panel, sequences are clustered phylogenetically, ordered top-to-bottom by position within a parsimony-based phylogenetic tree; therefore, mutations at a particular locus that are shared within a lineage are seen as vertical lines, and groupings of vertical lines that start and end at the same heights indicate coherent lineages defined by multiple mutations. Clades with more members are sorted lower. Colored arrowheads at the left margin indicate lineages of particular interest; smaller and larger arrowheads reflect the proportional representation of lineages among samples from a particular time window.

**Fig. S3. Transitions in key mutational patterns over time in local regions in Denmark and in England.** These figures are drawn as in Fig. 1C. Weekly running averages are plotted each day, with the actual counts on the left, and relative frequencies on the right. Regions with white banks indicate no sampling was done in that time frame. **A. English regional data over time.** The overall pattern seen in England in Fig. 1 was consistent across more local sampling in England (QUEH, CAMC, and MILK). The increased frequency of the GV clade, carrying the 4 G clade mutations plus an additional 8 mutations including the A222V mutation begins in early August, and it increases in prevalence relative to the G clade in each local region, but the transitions are more gradual than the later transition to the B.1.1.7 form indicated in orange. The lines indicate when a particular variant was introduced into the region, and the orange line indicates the first introduction of B.1.1.7, first sampled in late September and early October in each region. After the B.1.1.7 variant is first introduced, a very gradual increase in frequency is observed for a period, and then it begins to appreciably increase in frequency. **B. Danish regional data over time.** The B.1.1.7 form was introduced into Danish cities in November/December, and by mid-Jan was becoming more consistently observed. Danish sampling times are indicated on a weekly basis, UK daily, hence the broader bands. The N439K and N453Y variants, particularly in combination with the  $\Delta 69/70$  deletion, were more prominent among Danish samples than among the UK samples; both these and the original D614G form becoming less frequently sampled, and the GV form more prominent, at the point when the B.1.1.7 form was introduced into Denmark.

GV defining mutations from **figure S2**. 12 mutations, include the following  
 G clade mutations are highlighted

|                |                |                |         |
|----------------|----------------|----------------|---------|
| G00204T        | C06286T        | G21255C        | C24334T |
| <b>C00241T</b> | A11533G        | C21614T        | T26424C |
| T00445C        | <b>C14408T</b> | C22227T        | C26801G |
| <b>C03037T</b> | C15352T        | <b>A23403G</b> | C27944T |

B.1.1.7 mutations: 40 mutations

|                |                |                |         |
|----------------|----------------|----------------|---------|
| <b>C00241T</b> | T11293-        | A21768-        | G24914C |
| <b>C00913T</b> | T11294-        | T21769-        | C27972T |
| <b>C03037T</b> | T11295-        | G21770A        | G28048T |
| C03267T        | T11296-        | T21992-        | A28111G |
| C05388A        | <b>C14408T</b> | A21993-        | G28280C |
| C05986T        | C14676T        | T21994-        | A28281T |
| T06954C        | C15279T        | A23063T        | T28282A |
| T11288-        | T16176C        | C23271A        | G28881A |
| C11289-        | A21764-        | <b>A23403G</b> | G28882A |
| T11290-        | T21765-        | C23604A        | G28883C |
| G11291-        | A21766-        | C23709T        | C28977T |
| G11292-        | C21767-        | T24506G        |         |

**Table S2.** Statistical results.

| Variable 1     | Variable 2           | <sup>a</sup> Group Identifier | Measurement        | Sample Size | p value                | q value  | median_ Variable 1 | median_ Variable 2 | Figure referece | Test                                   |
|----------------|----------------------|-------------------------------|--------------------|-------------|------------------------|----------|--------------------|--------------------|-----------------|----------------------------------------|
| D614G          | B.1.1.7              | MDP1.1                        | ID50               | 40          | <b><u>5.80E-06</u></b> | 7.73E-05 | 1374               | 687                | 2A              | Wilcoxon signed-rank, paired, 2 tailed |
| D614G          | B.1.1.7              | NVVP1                         | ID50               | 28          | <b><u>1.80E-05</u></b> | 0.00018  | 975                | 448                | 2A              | Wilcoxon signed-rank, paired, 2 tailed |
| D614G          | B.1.1.7              | Convalescent                  | ID50               | 15          | 0.041                  | 0.065    | 1105               | 325                | 2A              | Wilcoxon signed-rank, paired, 2 tailed |
| D614G          | B.1.1.7              | MDP1.1                        | ID80               | 40          | <b><u>5.50E-12</u></b> | 2.20E-10 | 347                | 188                | 2B              | Wilcoxon signed-rank, paired, 2 tailed |
| D614G          | B.1.1.7              | NVVP1                         | ID80               | 28          | <b><u>1.50E-06</u></b> | 3.00E-05 | 209                | 142                | 2B              | Wilcoxon signed-rank, paired, 2 tailed |
| D614G          | B.1.1.7              | Convalescent                  | ID80               | 15          | <b>0.00061</b>         | 0.0022   | 218                | 106                | 2B              | Wilcoxon signed-rank, paired, 2 tailed |
| D614G          | D614G.N501Y          | MDP1.2                        | ID50               | 11          | 0.24                   | 0.30     | 1538               | 1604               | 2A              | Wilcoxon signed-rank, paired, 2 tailed |
| D614G          | D614G.N501Y          | Convalescent                  | ID50               | 15          | <b><u>0.0012</u></b>   | 0.0027   | 1105               | 412                | 2A              | Wilcoxon signed-rank, paired, 2 tailed |
| D614G          | D614G.N501Y          | MDP1.2                        | ID80               | 11          | 0.46                   | 0.53     | 453                | 347                | 2B              | Wilcoxon signed-rank, paired, 2 tailed |
| D614G          | D614G.N501Y          | Convalescent                  | ID80               | 15          | <b>0.00031</b>         | 0.0014   | 218                | 128                | 2B              | Wilcoxon signed-rank, paired, 2 tailed |
| D614G          | D614G.del69-70       | MDP1.2                        | ID50               | 11          | <b>0.00098</b>         | 0.0023   | 1538               | 2896               | 2A              | Wilcoxon signed-rank, paired, 2 tailed |
| D614G          | D614G.del69-70       | Convalescent                  | ID50               | 15          | 0.25                   | 0.30     | 1105               | 1244               | 2A              | Wilcoxon signed-rank, paired, 2 tailed |
| D614G          | D614G.del69-70       | MDP1.2                        | ID80               | 11          | <b>0.00098</b>         | 0.0023   | 453                | 617                | 2B              | Wilcoxon signed-rank, paired, 2 tailed |
| D614G          | D614G.del69-70       | Convalescent                  | ID80               | 15          | 0.15                   | 0.21     | 218                | 301                | 2B              | Wilcoxon signed-rank, paired, 2 tailed |
| D614G          | D614G.del69-70.N501Y | MDP1.2                        | ID50               | 11          | <b><u>0.002</u></b>    | 0.0042   | 1538               | 1804               | 2A              | Wilcoxon signed-rank, paired, 2 tailed |
| D614G          | D614G.del69-70.N501Y | Convalescent                  | ID50               | 15          | 0.073                  | 0.10     | 1105               | 923                | 2A              | Wilcoxon signed-rank, paired, 2 tailed |
| D614G          | D614G.del69-70.N501Y | MDP1.2                        | ID80               | 11          | 0.21                   | 0.28     | 453                | 475                | 2B              | Wilcoxon signed-rank, paired, 2 tailed |
| D614G          | D614G.del69-70.N501Y | Convalescent                  | ID80               | 15          | 0.72                   | 0.74     | 218                | 219                | 2B              | Wilcoxon signed-rank, paired, 2 tailed |
| D614G          | D614G.del69-70.Y453F | MDP1.2                        | ID50               | 11          | 0.24                   | 0.30     | 1538               | 1365               | 2A              | Wilcoxon signed-rank, paired, 2 tailed |
| D614G          | D614G.del69-70.Y453F | Convalescent                  | ID50               | 15          | 0.012                  | 0.023    | 1105               | 343                | 2A              | Wilcoxon signed-rank, paired, 2 tailed |
| D614G          | D614G.del69-70.Y453F | MDP1.2                        | ID80               | 11          | 0.58                   | 0.62     | 453                | 351                | 2B              | Wilcoxon signed-rank, paired, 2 tailed |
| D614G          | D614G.del69-70.Y453F | Convalescent                  | ID80               | 15          | <b><u>0.0084</u></b>   | 0.017    | 218                | 122                | 2B              | Wilcoxon signed-rank, paired, 2 tailed |
| D614G          | D614G.N439K          | MDP1.2                        | ID50               | 11          | 0.76                   | 0.76     | 1538               | 1312               | 2A              | Wilcoxon signed-rank, paired, 2 tailed |
| D614G          | D614G.N439K          | Convalescent                  | ID50               | 15          | <b>0.00061</b>         | 0.0022   | 1105               | 688                | 2A              | Wilcoxon signed-rank, paired, 2 tailed |
| D614G          | D614G.N439K          | MDP1.2                        | ID80               | 11          | 0.46                   | 0.53     | 453                | 481                | 2B              | Wilcoxon signed-rank, paired, 2 tailed |
| D614G          | D614G.N439K          | Convalescent                  | ID80               | 15          | <b>0.00085</b>         | 0.0023   | 218                | 151                | 2B              | Wilcoxon signed-rank, paired, 2 tailed |
| D614G.N501Y    | D614G.del69-70.N501Y | MDP1.2                        | ID50               | 11          | 0.042                  | 0.065    | 1604               | 1804               | 2A              | Wilcoxon signed-rank, paired, 2 tailed |
| D614G.N501Y    | D614G.del69-70.N501Y | Convalescent                  | ID50               | 15          | <b><u>6.10E-05</u></b> | 0.00035  | 412                | 923                | 2A              | Wilcoxon signed-rank, paired, 2 tailed |
| D614G.N501Y    | D614G.del69-70.N501Y | MDP1.2                        | ID80               | 11          | <b><u>0.014</u></b>    | 0.024    | 347                | 475                | 2B              | Wilcoxon signed-rank, paired, 2 tailed |
| D614G.N501Y    | D614G.del69-70.N501Y | Convalescent                  | ID80               | 15          | <b>0.00018</b>         | 0.00090  | 128                | 219                | 2B              | Wilcoxon signed-rank, paired, 2 tailed |
| D614G.del69-70 | D614G.del69-70.N501Y | MDP1.2                        | ID50               | 11          | <b><u>0.042</u></b>    | 0.065    | 2896               | 1804               | 2A              | Wilcoxon signed-rank, paired, 2 tailed |
| D614G.del69-70 | D614G.del69-70.N501Y | Convalescent                  | ID50               | 15          | 0.52                   | 0.58     | 1244               | 923                | 2A              | Wilcoxon signed-rank, paired, 2 tailed |
| D614G.del69-70 | D614G.del69-70.N501Y | MDP1.2                        | ID80               | 11          | <b><u>0.014</u></b>    | 0.024    | 617                | 475                | 2B              | Wilcoxon signed-rank, paired, 2 tailed |
| D614G.del69-70 | D614G.del69-70.N501Y | Convalescent                  | ID80               | 15          | 0.064                  | 0.095    | 301                | 219                | 2B              | Wilcoxon signed-rank, paired, 2 tailed |
| D614G.del69-70 | D614G.del69-70.Y453F | MDP1.2                        | ID50               | 11          | <b>0.00098</b>         | 0.0023   | 2896               | 1365               | 2A              | Wilcoxon signed-rank, paired, 2 tailed |
| D614G.del69-70 | D614G.del69-70.Y453F | Convalescent                  | ID50               | 15          | <b><u>6.10E-05</u></b> | 0.00035  | 1244               | 343                | 2A              | Wilcoxon signed-rank, paired, 2 tailed |
| D614G.del69-70 | D614G.del69-70.Y453F | MDP1.2                        | ID80               | 11          | <b>0.00098</b>         | 0.0023   | 617                | 351                | 2B              | Wilcoxon signed-rank, paired, 2 tailed |
| D614G.del69-70 | D614G.del69-70.Y453F | Convalescent                  | ID80               | 15          | <b><u>6.10E-05</u></b> | 0.00035  | 301                | 122                | 2B              | Wilcoxon signed-rank, paired, 2 tailed |
| Moderna D29    | Moderna D57          | B.1.1.7                       | D614G/B.1.1.7_ID50 | 11, 29      | <b>0.00066</b>         | 0.0022   | 3.51               | 1.97               | 2C              | Wilcoxon rank sum, 2 tailed            |
| Moderna D29    | Moderna D57          | B.1.1.7                       | D614G/B.1.1.7_ID80 | 11, 29      | 0.59                   | 0.62     | 1.75               | 1.7                | 2C              | Wilcoxon rank sum, 2 tailed            |

<sup>a</sup>Group identifier: MDP1.1- Moderna Phase 1 Set 1; MDP1.2- Moderna Phase 1 set 2; NVVP1- Novavax Phase 1.

Underlined: p<0.01

**Bold:** p<0.001

**Bold and underlined:** p<0.0001

Grey shade: fold difference between median of two variables in comparison <1.3 and >0.77 (reflecting <30% difference in median values).

**Table S3.** Primers used for site-directed mutagenesis.

| Primer       | 5'-Sequence-3'                             |
|--------------|--------------------------------------------|
| H69-V70      | 5'-ccattggtgccgctgatggcgtggaacc-3'         |
| H69-V70-anti | 5'-ggttccacgccatcagcggcaccaatgg-3'         |
| N501Y        | 5'-agcccacgccatagtgtggctggaagccgtag-3'     |
| N501Yanti    | 5'-ctacggcttccagccaacataggcgtgggct-3'      |
| N439K        | 5'-tgctatccagattcttagagttccaggcgtacag-3'   |
| N439K-anti   | 5'-cgtgatcgcctggaactctaagaatctggatagca-3'  |
| Y453F        | 5'-ctaaacagccggaacagataattgtagtgtccgccc-3' |
| Y453F-anti   | 5'-ggcggaactacaattatctgttccggctgttag-3'    |
| A570D        | 5'-ggcgtctgtggtatcatcgatgtccctgccga-3'     |
| A570D_anti   | 5'-tcggcagggacatcgatgataccacagacgcc-3'     |
| P681H        | 5'-cagaccgtgctcctatgggagttgtctgggt-3'      |
| P681H-anti   | 5'-accagacaaactccataggagagcacggtctg-3'     |
| T716I        | 5'-cggagattgtgaagttgatagggatggcgatagaa-3'  |
| T716I-anti   | 5'-ttctatcgccatccctatcaactcacaatctccg-3'   |
| S982A        | 5'-cacctgtccagccgggaggatgtcattcagc-3'      |
| S982A-anti   | 5'-gctgaatgacatcctggcccggctggacaaggtg-3'   |
| D1118H       | 5'-cacgaatgtattgtgtggtgatgatctgtggc-3'     |
| D1118H-anti  | 5'-gccacagatcatcaccacacacaatacattcgtg-3'   |
| Y144-        | 5'-acttattgttctgtgatacagcccaggaatggatc-3'  |
| Y144-anti    | 5'-gatccattcctggcgtgtatcacaagaacaataagt-3' |
